1     **Differential chondrogenic differentiation between iPSC-derived from healthy and**  
2     **OA cartilage is associated with changes in epigenetic regulation and metabolic**  
3     **transcriptomic signatures**

4  
5             Nazir M. Khan<sup>1,2</sup>, Martha Elena Diaz-Hernandez<sup>1,2</sup>, Samir Chihab<sup>1,2</sup>, Priyanka  
6     Priyadarshani<sup>3</sup>, Pallavi Bhattaram<sup>1</sup>, Luke J. Mortensen<sup>3,4</sup>, Rosa M Guzzo<sup>5</sup>, Hicham  
7             Drissi<sup>1,2</sup>

8  
9  
10    <sup>1</sup>Department of Orthopaedics, Emory University, Atlanta, GA, USA

11    <sup>2</sup>Atlanta VA Medical Center, Decatur, GA, USA

12    <sup>3</sup>School of Chemical Materials and Biomedical Engineering, University of Georgia,  
13    Athens, GA

14    <sup>4</sup>Regenerative Bioscience Center, E.L. Rhodes Center for ADS, University of Georgia,  
15    Athens, GA

16    <sup>5</sup>Department of Neuroscience, School of Medicine, University of Connecticut Health,  
17    Farmington, CT, USA

18

19

20

21    **Running Title:** Epigenetic and metabolic memory influences the chondrogenic potential  
22    of iPSCs.

23

24

25    **\*Address for correspondence:**

26    Hicham Drissi, Ph.D.  
27    Director, Emory Musculoskeletal Research Centre  
28    Professor and Vice Chair Research  
29    Department of Orthopaedics,  
30    Emory University School of Medicine,  
31    Atlanta, GA-30033, USA.  
32    Email: [hicham.drissi@emory.edu](mailto:hicham.drissi@emory.edu)

33

34

35

36 **ABSTRACT:**

37 Induced pluripotent stem cells (iPSCs) are potential cell sources for regenerative  
38 medicine. The iPSCs exhibit a preference for lineage differentiation to the donor cell type  
39 indicating the existence of memory of origin. Although the intrinsic effect of the donor cell  
40 type on differentiation of iPSCs is well recognized, whether disease-specific factors of  
41 donor cells influence the differentiation capacity of iPSC remains unknown. Using viral  
42 based reprogramming, we demonstrated the generation of iPSCs from chondrocytes  
43 isolated from healthy (AC-iPSCs) and osteoarthritis cartilage (OA-iPSCs). These  
44 reprogrammed cells acquired markers of pluripotency and differentiated into  
45 uncommitted-mesenchymal progenitors. Interestingly, AC-iPSCs exhibited enhanced  
46 chondrogenic potential as compared OA-iPSCs and showed increased expression of  
47 chondrogenic genes. Pan-transcriptome analysis showed that chondrocytes derived from  
48 AC-iPSCs were enriched in molecular pathways related to energy metabolism and  
49 epigenetic regulation, together with distinct expression signature that distinguishes them  
50 from OA-iPSCs. The molecular tracing data demonstrated that epigenetic and metabolic  
51 marks were imprint of original cell sources from healthy and OA-chondrocytes. Our results  
52 suggest that the epigenetic and metabolic memory of disease may predispose OA-iPSCs  
53 for their reduced chondrogenic differentiation and thus regulation at epigenetic and  
54 metabolic level may be an effective strategy for controlling the chondrogenic potential of  
55 iPSCs.

56

57 **INTRODUCTION:**

58 Osteoarthritis (OA) is an inflammatory joint disease in which catabolic cascade of  
59 events results in cartilage destruction leading to severe joint pain.<sup>1</sup> While non-surgical  
60 procedures such as NSAID and steroid injections are helpful, the majority of OA cases  
61 ultimately undergo joint replacement therapy. The induced pluripotent stem cells (iPSCs)  
62 were recently proposed as a promising source to repair cartilage damage.<sup>2,3</sup> While iPSCs  
63 are seriously considered as potential cell sources for regenerative medicine,  
64 accumulating evidence suggests that iPSCs from different cell sources have distinct  
65 molecular and functional properties.<sup>4-8</sup> It has been reported that iPSCs derived from  
66 various somatic cell types exhibited a preference for differentiation into their original cell  
67 lineages.<sup>4,9</sup> Therefore, the effects of the cellular origin of iPSCs on their lineage-specific  
68 differentiation capacity is an important consideration for cell replacement therapies, drug  
69 screening, or disease modeling.

70 Several studies have determined that iPSCs retain a memory of their cellular origin  
71 due to residual DNA methylation and histone modification patterns at lineage specific  
72 genes. Thus, this residual 'epigenetic memory' has been shown to bias their subsequent  
73 differentiation into their parental/donor cell lineage.<sup>10-12</sup> Although it is known that cellular  
74 origin of iPSCs influences their differentiation capacity, the contribution of disease-

75 specific factors on the capacity of iPSC for chondrogenic differentiation remains unknown.  
76 Examining potential differences between cells that reside in healthy versus OA  
77 environments, would provide unique insight into the chondrogenic potential of these cells,  
78 and their utility in disease modeling. Since OA articular chondrocytes exhibit different  
79 features from healthy articular chondrocytes, we posit that the iPSCs derived from these  
80 cell states represent the feature of their physiological origin. Thus, the memory of the cells  
81 is not only specific to the tissue of origin but also to the physiological status which further  
82 influences the differentiation capacity and ultimately the efficiency of tissue regeneration.

83 In the present study, we aimed to determine whether iPSCs derived from healthy  
84 and diseased (OA) cartilage possess differential chondrogenic potential, and whether OA  
85 disease status significantly limits their differentiation capacity. To this end, we derived  
86 iPSCs from healthy (AC-iPSCs) and OA chondrocytes (OA-iPSCs) and compared their  
87 differentiation capacity into chondroprogenitors and chondrocytes. During differentiation  
88 of iPSCs into chondrocytes, we determined the epigenetic and metabolic marks of cellular  
89 memory. Our results showed that iPSCs derived from healthy chondrocytes (AC-iPSCs)  
90 exhibited an enhanced potential for chondrocyte differentiation as compared to OA-  
91 iPSCs. Our data further demonstrate that although reprogramming of OA chondrocytes  
92 induced pluripotency, the OA-iPSCs retained the epigenetic and metabolic marks  
93 associated with pathological conditions of diseased chondrocytes and retention of this  
94 cellular memory influence their chondrogenic commitment and thus regenerative capacity  
95 for the cartilage repair. Our findings indicate that regulating the epigenetic modifiers and  
96 energy metabolism may be an effective strategy for enhancing the chondrogenic potential  
97 of iPSCs derived from chondrocytes.

98

## 99 **RESULTS:**

### 100 **Characterization of iPSCs generated from healthy and OA articular chondrocytes:**

101 We previously reported the generation of iPSCs from healthy articular chondrocytes (AC-  
102 iPSCs) and performed molecular, cytochemical, and cytogenetic analyses to determine the  
103 pluripotency of generated iPSCs.<sup>13</sup> In the present study, we used multiple clones of the  
104 previously generated AC-iPSCs (clones #7, #14, and # 15), and compared their  
105 pluripotency, progenitor properties and chondrogenic potential to that of newly generated  
106 OA-derived iPSCs (OA-iPSCs) (clones #2, #5 and #8) (**Fig. 1A**). These colonies showed  
107 positive alkaline phosphatase (ALP) staining, indicating an undifferentiated pluripotent  
108 stem cell phenotype of both AC-iPSC and OA-iPSC clones (**Fig. 1B**). Stemness  
109 characteristics of these iPSC clones was evaluated via qPCR assessment of key  
110 pluripotency marker genes. The mRNA copy number of *SOX2*, *OCT4*, *NANOG* and *KLF4*  
111 were comparable in AC-iPSCs and OA-iPSCs (**Fig. 1C**) indicating a similar level of  
112 stemness identity between these iPSCs. Interestingly, *KLF4* expression was low as  
113 compared to the other pluripotency gene in both iPSCs (**Fig. 1C**). Pluripotency was also

114

Figure 1

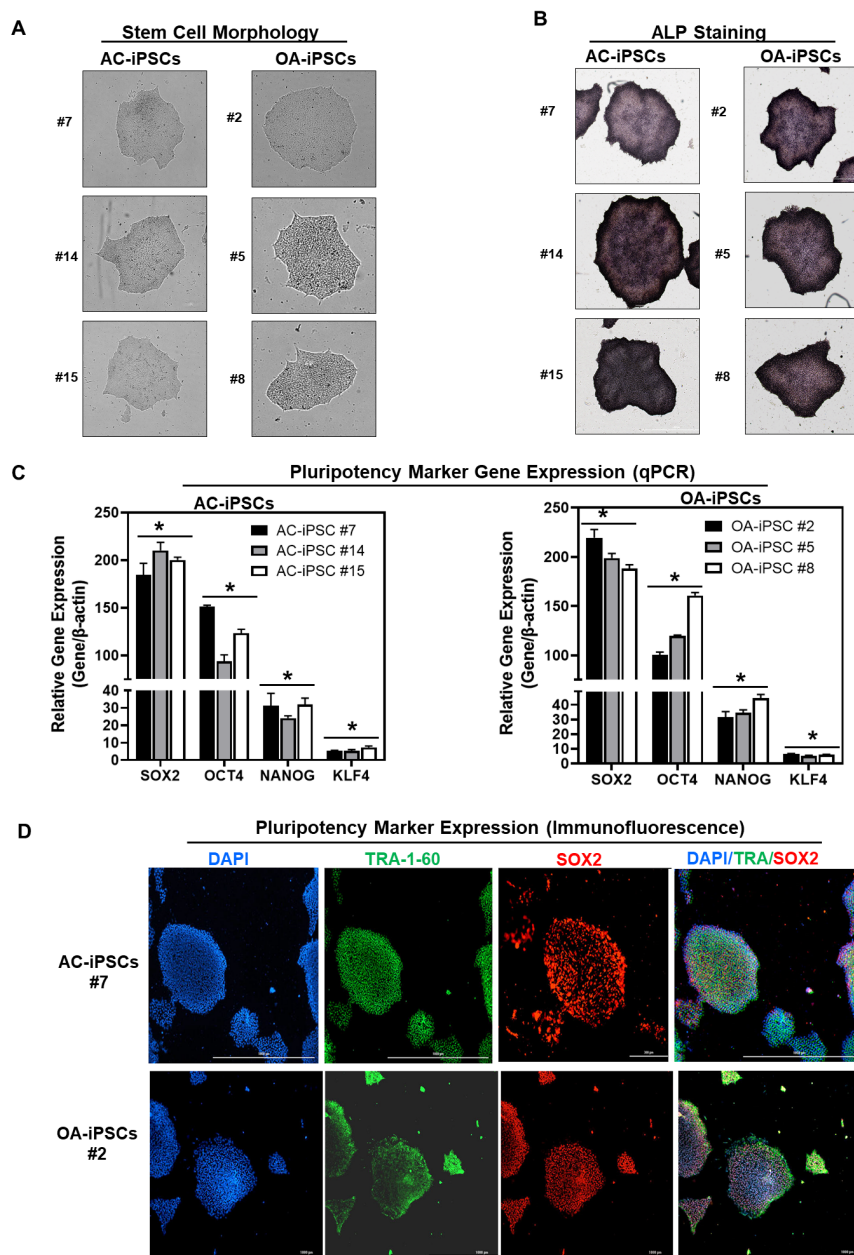

**Figure 1: Characterization of iPSCs generated from healthy and OA articular chondrocytes: (A)** Morphology of the AC-iPSC (#7, #14, #15) and OA-iPSC (#2, #5, #8) colonies in monolayer culture on a 0.1% Geltrex coated plate; **(B)** Alkaline phosphatase (ALP) staining of iPSC colonies showing undifferentiated pluripotent stage; **(C)** Pluripotency for iPSC colonies showing expression of stemness genes. RT-qPCR analyses showed induced expression of canonical stemness genes *SOX2*, *OCT4*, *NANOG* and *KLF4* in AC-iPSC and OA-iPSC colonies.  $\beta$ -actin served as the housekeeping gene and internal control. Represented gene expression data is relative to MSCs derived from respective iPSC cells.  $*P \leq 0.01$ , as compared to their respective MSCs. **(D)** Immunofluorescence staining of pluripotency markers in AC-iPSCs (#7) and OA-iPSCs (#2) showed expression of surface TRA-1-60 and SSEA-4 antigens in these colonies. DAPI is used as nuclear counterstain showing blue nuclei. Scale bar, 100  $\mu$ m

The online version of this article includes the following source data for figure 1:

Figure 1-source data 1. Depicting original raw data related to Figure 1.

115 colonies from both AC-iPSCs and OA-iPSCs showed positive expression of SOX2 and  
116 TRA-1-60 proteins (**Fig.1D**).

117 **MSCs differentiated from AC-iPSCs and OA-iPSCs exhibit comparable phenotypic**  
118 **features *in vitro***: Differentiation of human iPSCs into mature chondrocytes requires  
119 derivation into an intermediate stage termed as mesenchymal progenitors.<sup>13;16;17;22</sup>  
120 Therefore, we generated mesenchymal progenitor intermediate from all three clones of  
121 both AC- and OA-iPSCs using our established direct plating method in presence of serum  
122 and human recombinant bFGF.<sup>17;22</sup> MSCs derived from both AC-iPSCs (termed as AC-  
123 iMSCs) and OA-iPSCs (termed as OA-iMSCs) displayed similar phenotypic  
124 characteristics of spindle-shaped and elongated morphology (**Fig. 2A**). We next  
125 performed detailed characterization of iMSCs from both sources to determine their  
126 mesenchymal properties. Profiling by qPCR showed significant suppression of stemness  
127 genes including SOX2 and OCT4, in both AC-iMSCs and OA-iMSCs as compared to the  
128 parental undifferentiated AC-iPSCs and OA-iPSCs respectively (**Fig. 2B**). We also  
129 analyzed the expression of marker genes associated with the mesenchymal lineage and  
130 our results showed that mRNA expression of *TWIST1* (an epithelial to mesenchymal  
131 transition related gene), *COL1A1* (an ECM molecule synthesized by MSCs) and *RUNX1*  
132 (a transcription factor expressed in mesenchymal progenitors) was significantly higher in  
133 both iMSCs as compared to the pluripotent parental iPSCs (**Fig. 2B**).

134 Consistent with the standard criteria defined by the International Society of Cell  
135 and Gene Therapy (ISCT)<sup>18</sup>, immunophenotypic analyses revealed the exhibition of all  
136 typical MSC markers in both iMSC progenitors with high expression levels of CD44,  
137 CD73, CD90, CD105, and CD166 surface markers (**Fig. 2C**). Conversely, both iMSCs  
138 largely lacked expression of the definitive hematopoietic lineage marker CD45, and the  
139 endothelial marker CD31. Comparative analysis of these markers in AC-iMSCs and OA-  
140 iMSCs showed comparable expression levels suggesting an identical immunophenotype  
141 of both iMSCs (**Fig. 2D**). To determine the multipotential of these iMSCs, we performed  
142 their trilineage differentiation using *in vitro* adipogenic, osteogenic, and chondrogenic  
143 differentiation assays (**Supplementary Fig. 1A, B**). Although both MSCs could clearly  
144 form osteoblasts, adipocytes, and chondrocytes, AC-iMSCs displayed enhanced  
145 chondrogenic potential as evidenced by increased deposition of Alcian blue positive  
146 extracellular matrix compared to OA-iMSCs (**Supplementary Fig. 1B**). Altogether, the  
147 data suggest that iMSCs derived from AC-iPSCs and OA-iPSCs exhibit similarities in  
148 morphology, immunophenotype, and multipotency as evidenced by *in vitro* differentiation  
149 assays for adipocytes and osteoblasts. However, AC-iMSCs displayed increased  
150 chondrogenic differentiation as compared to OA-iMSCs.

151

152

153

154

**Figure 2**

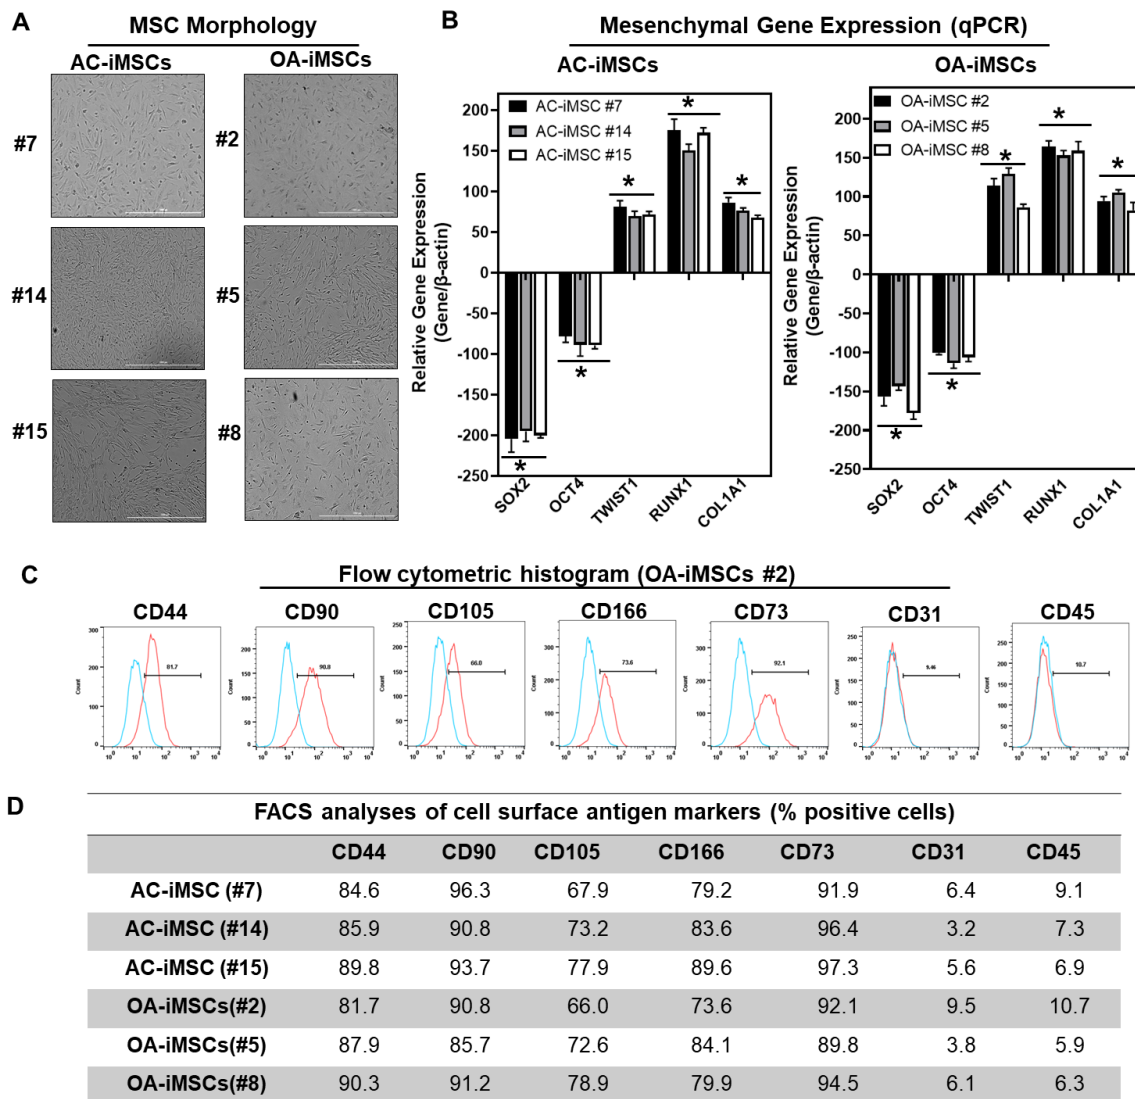

**Figure 2: Derivation of iPSC-MSCs (iMSCs) like cells from AC- and OA-iPSCs and characterization of their mesenchymal feature:** (A) The morphology of the iMSC-like cells (iPSC–MSC) derived from AC- and OA-iPSC showing elongated spindle shaped cells. Representative images are shown for iMSCs at passage 5-8. Scale bar, 100  $\mu$ m. (B) Gene expression analyses by qPCR showing significant suppression of pluripotent markers OCT4, and SOX2 and induction of mesenchymal genes TWIST1, COL1A1, and RUNX1 in the AC- and OA-iMSCs relative to their parental iPSCs.  $\beta$ -actin served as the housekeeping gene and internal control. Expression data is represented as fold change relative to respective parental iPSCs. \* $P \leq 0.01$ , as compared to their respective iPSCs. (C) Expression of surface antigens in AC- and OA-iMSCs by flow analysis. Representative flow cytometric histogram showing OA-iMSCs (#2) express markers associated with the mesenchymal phenotype (positive for CD44, CD73, CD90, CD105, and CD166; negative for CD31, and CD45). Red histogram shows antibody-stained population; Blue profile shows negative isotype-stained population. (D) Comparative flow cytometry analyses of AC-iMSCs (#7, #14, #15) and the OA-iMSCs (#2, #5, #8) showing similar cell surface expression profiles.

The online version of this article includes the following source data for figure 2:  
Figure 2-source data 1. Depicting original raw data related to Figure 2.

155 **AC-iMSCs exhibit enhanced chondrogenic potential *in vitro*:** We next evaluated  
156 whether AC-iMSCs exhibit higher propensity for chondrogenic differentiation as  
157 compared to OA-iMSCs. Chondrogenic differentiation of these iMSCs were examined  
158 using our well-established pellet culture method using chondrogenic media in the  
159 presence of human recombinant BMP-2 (**Fig. 3A**).<sup>13;16;17;22</sup> Quantitative PCR analyses of  
160 key chondrogenic genes was used to evaluate the potential of AC-iMSCs and OA-iMSCs  
161 to produce chondrocytes at days 7, 14, and 21. When compared to the undifferentiated  
162 MSC culture (Day 0), induction of *SOX9*, *COL2A1*, and *ACAN* transcript was significantly  
163 increased at day 7, and to a greater extent at day 14 (**Fig. 3C**). Interestingly, mRNA  
164 expression of *SOX9*, *COL2A1*, and *ACAN* were significantly higher in AC-iMSCs as  
165 compared to OA-iMSCs at all time points analyzed (Day 7, 14, 21) suggesting that iPSC  
166 derived from healthy chondrocytes have a significantly higher chondrogenic potential as  
167 compared to OA-iPSC (**Fig. 3C**).

168 We also performed chondrogenic differentiation of these iMSCs using high density  
169 adherent micromass culture method. 3D-micromass culture of pluripotent stem cells  
170 resemble the formation of prechondrogenic mesenchymal condensations and their  
171 differentiation into the chondrogenic lineage.<sup>17;32</sup> Alcian blue staining of Day 21  
172 micromass culture of AC-iMSCs showed densely stained central core surrounded by a  
173 diffusely stained outer cellular layer showing increased accumulation of glycoprotein-rich  
174 matrix as compared to OA-iMSCs (**Fig. 3B**). Additionally, Alcian blue staining in AC-  
175 iMSCs further showed increased cellular outgrowths and cartilaginous nodules,  
176 confirming enhanced chondrogenic potential of AC-iMSCs as compared to OA-iMSCs  
177 (**Fig. 3B**). These Alcian blue staining showing ECM synthesis are in line with the  
178 expression data for the matrix genes. These data further indicate that iMSCs derived from  
179 OA chondrocytes showed reduced ECM generation upon chondrogenic differentiation  
180 which may be a retention of OA phenotype of original cell source.

181 **AC-iMSCs exhibit distinct transcriptomic signature during chondrogenic**  
182 **differentiation:** To examine the underlying transcriptional programs associated with  
183 enhanced chondrogenic potential of AC-iMSCs as compared to OA-iMSCs, we performed  
184 RNA-seq analysis. We identified gene expression changes at pan-genome levels in day  
185 21 differentiated chondrocytes from AC-iMSCs (#7) and OA-iMSCs (#5). The volcano plot  
186 showed that global gene expression profiles of the chondrocytes at day 21 chondrogenic  
187 culture of AC-iMSCs were significantly different from the OA-iMSCs (**Fig. 4A**). This  
188 analysis identified 146 genes that were upregulated, and 263 genes that were  
189 downregulated in chondrocytes derived from AC-iMSCs (termed as AC-iChondrocytes)  
190 as compared to OA-iMSCs (termed as OA-iChondrocytes) (**Fig. 4A**). To validate these  
191 findings, we performed quantitative gene expression analysis of a subset of DEGs such  
192 as *FOXS1*, *ADAM12*, *COL1A1*, *COL3A1*, *MATN4*, and *MARK1* during chondrogenic  
193 differentiation and analysis confirmed differential expression levels in AC- vs OA-  
194 iChondrocytes (**Supplementary Fig. 2**).

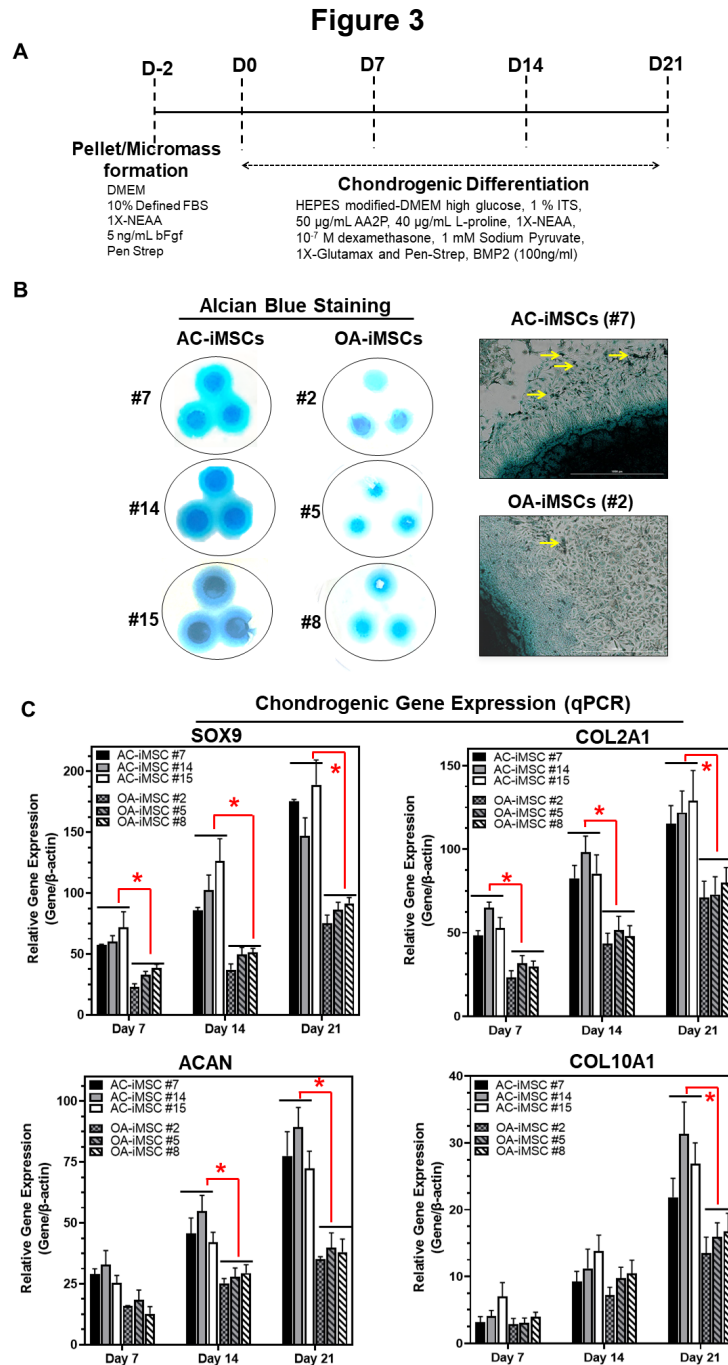

**Figure 3: AC-iMSCs exhibit superior chondrogenic potential *in vitro*:** (A) Schematic showing treatment conditions for *in vitro* chondrogenic differentiation of AC- and OA-iMSCs using pellet and micromass method. (B) Chondrocyte differentiation was shown by Alcian blue staining of micromass cultures in serum free chondrogenic media for 21 days with 100 ng/ml BMP2. Alcian blue staining revealed accumulation of sulfated proteoglycans indicating enhanced secretion of matrix in AC-iMSC as compared to OA-iMSCs micromass culture. High magnification images further demonstrated enhanced cellular compaction (yellow arrow) in AC-iMSCs micromass indicating the development of cartilaginous nodules. Scale bar, 100 µm. (C) Quantitative PCR analyses of the relative transcript levels of chondrogenic genes *SOX9*, *COL2A1*, *ACAN* and hypertrophic gene *COL10A1* in Day 7, 14, and 21 pellet culture of all three clones of AC- and OA-iMSCs. β-actin served as the housekeeping gene and internal control. Values represent fold induction (Mean±SD) relative to control iMSCs (Day 0) from three replicate. \*P≤0.01 indicate values are statistically different in OA-iMSCs as compared to their AC-iMSCs at each timepoint.

The online version of this article includes the following source data for figure 3:  
Figure 3-source data 1. Depicting original raw data related to Figure 3.



**Figure 4**

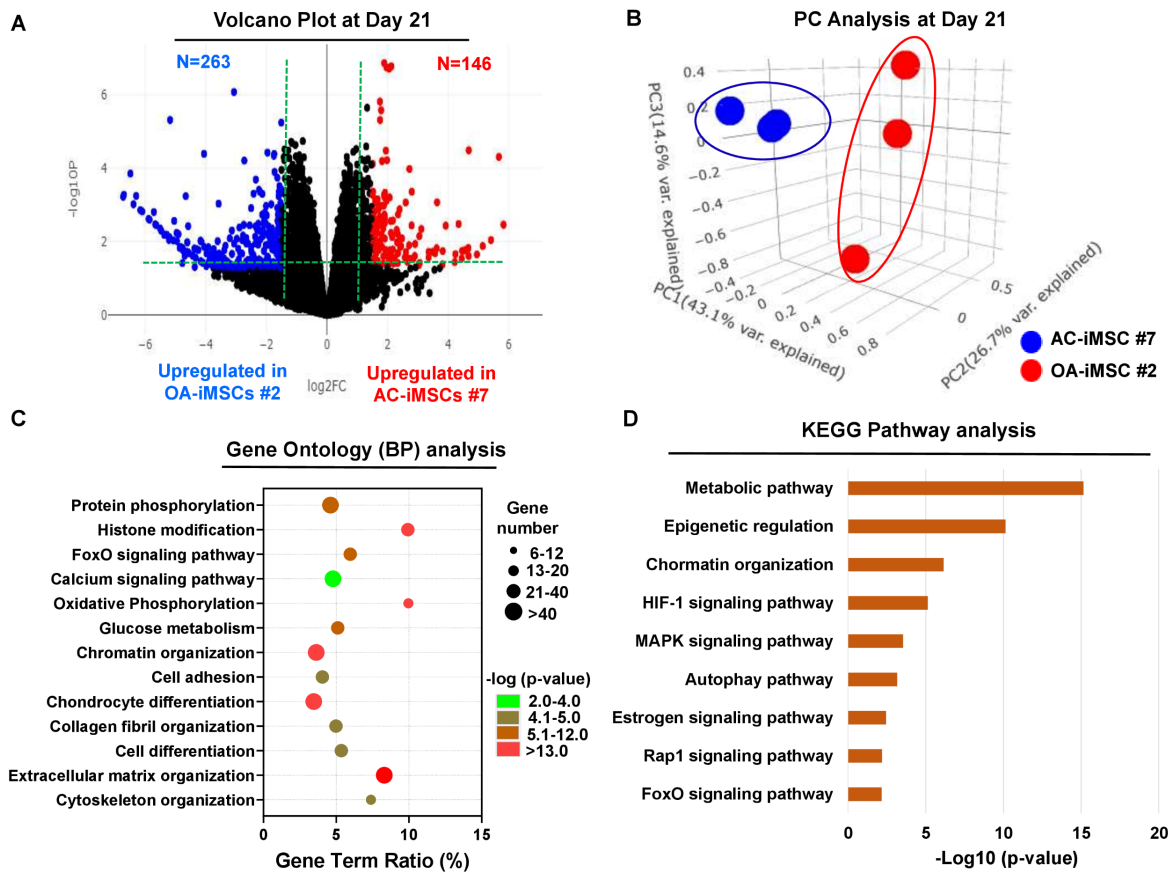

**Figure 4: AC-iMSCs during chondrogenic differentiation exhibit distinct transcriptome signature:**

Bulk RNA-Sequencing was performed during chondrogenic differentiation of AC- vs OA-iMSCs and differential gene expression analyses revealing distinct transcriptomic signature. **(A)** Genes with differential expression levels greater than 2-fold (FDR P value < 0.05) were visualized as volcano plot showing differential expression of 406 genes. **(B)** Principal component analysis (PCA) using differentially expressed genes (DEGs) showing segregation of AC-iChondrocytes vs OA-iChondrocytes generated during day 21 chondrogenic differentiation using pellet culture. **(C)** Functional annotation clustering using GO analysis for biological process (BP) using DEGs at day 21 chondrogenic differentiation of AC- vs OA-iMSCs. Y-axis label represents pathway, and X-axis label represents gene term ratio (gene term ratio = gene numbers annotated in this pathway term/all gene numbers annotated in this pathway term). Size of the bubble represents the number of genes enriched in the GO terms, and color showed the FDR P value of GO terms. **(D)** KEGG pathway analysis showing enrichment of molecular pathways contributing to differential chondrogenic potential of AC- vs OA-iMSCs.

The online version of this article includes the following source data for figure 4:

Figure 4-source data 1. Depicting original raw data related to Figure 4.

Figure 4-source data 2. Depicting original raw data related to Figure 4.

196 Additionally, principal component analyses placed AC- and OA-iChondrocytes in two  
 197 distinct clusters suggesting that chondrocytes derived from AC-iMSCs were genomically  
 198 distinct from OA-iMSC derived chondrocytes (**Fig. 4B**).

199 We next performed functional annotation analyses of these differentially regulated  
200 genes to determine the enrichment of GO terms and molecular pathways. Our GO  
201 analyses demonstrated significant enrichment of several biological processes in AC-  
202 iChondrocytes including histone modification, chromatin organization, oxidative  
203 phosphorylation, glucose metabolism, chondrocyte differentiation and ECM organization  
204 (**Fig. 4C**). These results suggest that pathways related to ‘Energy Metabolism’ and  
205 ‘Epigenetic Regulation’ play an important role in chondrogenic differentiation of AC-  
206 iMSCs. We also performed KEGG pathway analysis and results showed that ‘Metabolic  
207 Pathways’, ‘Epigenetic Regulation’ and ‘Chromatin Organization’ are the most enriched  
208 pathways in AC-iMSCs (**Fig. 4D**). These data suggest that a large proportion of DEGs  
209 between AC- and OA-iChondrocytes were involved in ‘Energy Metabolic pathways’ such  
210 as oxidative phosphorylation, glucose metabolism and protein phosphorylation and  
211 ‘Epigenetic Regulatory pathways’ such as chromatin organization and histone  
212 modification. The regulatory genes involved in these pathways such as *HDAC10/11*,  
213 *PRMT6*, *PRR14*, *ATF2*, *SS18L1*, *JDP2*, *RUVBL1/2*, *OGDHL*, *ALDH2*, *GCLC*, *GOT1*,  
214 *HIF1A*, *COX5A*, and *TRAF6* etc. may create a distinct metabolic and chromatin state in  
215 AC-iMSCs which favors its enhanced chondrogenic differentiation.

216 **AC-iMSCs revealed enrichment of interaction networks related to energy**  
217 **metabolism and epigenetic regulation during chondrogenic differentiation:** To  
218 determine the functional relationships among genes that were differentially regulated  
219 during chondrogenic differentiation of AC- and OA-iMSCs, we performed interaction  
220 network analyses. Our analysis identified two major subnetworks distributed in two  
221 distinct clusters belonging to energy metabolism and epigenetic regulation suggesting a  
222 role for these pathways in chondrogenic differentiation of AC-iMSCs (**Fig. 5A, B**). The  
223 ClueGO analysis in metabolic gene network cluster showed enrichment of several energy  
224 metabolic pathways such as Glycolysis, Amino acids synthesis, Autophagy and  
225 Biosynthesis and anabolic pathways suggesting that multiple metabolic signaling  
226 networks in energy metabolism may contribute to enhanced chondrogenic potential of  
227 AC-iMSCs (**Fig. 5A**). Similarly, Epigenetic regulator gene network cluster comprise of  
228 several pathways related to histone modification, chromatin regulation, histone  
229 acetylation and chromatin assembly/disassembly. These data suggest that during  
230 chondrogenic differentiation of AC-iMSCs, several chromatin modifiers were activated  
231 which may regulate key genes involved chondrogenic differentiation (**Fig. 5B**).

232 To further implicate the role of ‘energy metabolism’ and ‘epigenetic regulator  
233 pathways’ in differential chondrogenic potential, we analyzed the expression profile of  
234 genes involved in these pathways during chondrogenic differentiation of AC- and OA-  
235 iMSCs. The heatmap analysis during terminal chondrogenic differentiation (Day 21)  
236 showed that the expression profile of various metabolic and epigenetic regulator genes  
237 exhibits differential expression in AC- vs OA-iChondrocytes. (**Fig. 5C, D**). Moreover, the  
238 expression profile for metabolic and epigenetic factor genes correlates well with

239 chondrogenic differentiation of these iMSCs further suggesting the importance of these  
240 pathways in enhanced chondrogenic potential of AC-iMSCs. Altogether, these data  
241 suggest that metabolic and epigenetic regulatory pathways play a role in chondrogenic  
242 potential of AC-iMSCs.

243 **AC-iMSCs at the undifferentiated state showed distinct expression of genes**  
244 **involved in energy metabolism and epigenetic regulation:** The data in Figure 5C, D  
245 show that during chondrogenic differentiation, AC-iMSCs exhibit differential expression  
246 for the metabolic and chromatin regulator genes. We next examined whether this  
247 differential gene expression profile was intrinsic to AC-iMSCs or acquired during the  
248 process of chondrogenic differentiation. To this end, we performed transcriptomic  
249 analyses at various stages of chondrogenic differentiation of AC- and OA-iMSCs. Volcano  
250 plot analysis identified that AC- and OA-iMSCs at undifferentiated steady-state (Day 0)  
251 exhibited differential expression at pan-genome level with >800 differentially expressed  
252 genes (Fig. 6A). We next focused our analysis on the expression of genes involved in  
253 energy metabolic and epigenetic regulator pathways. Similar to the level observed at  
254 terminal differentiation stage, our analysis revealed that metabolic and chromatin  
255 regulator genes also showed significant differences between both cell types at the  
256 uncommitted mesenchymal state (Fig. 6B, C). When compared to OA-iMSCs, the AC-  
257 iMSCs expressed higher levels of several metabolic gene involved in glycolysis, amino  
258 acid synthesis, autophagy, and anabolic pathways such as *ALDOB*, *CD180*, *SQSTM1*,  
259 *ENO3*, *AOX1*, *KMT2D*, *COX5A*, *PRDX1*, *SDHB*, *ALDH2* etc (Fig. 6B). Moreover,  
260 differential expression of multiple chromatin modifiers including histone modifiers (eraser,  
261 reader and writers) and chromatin remodeling factors such as *JDP2*, *RUVBL1/2*,  
262 *MYBBP1A*, *HDAC10*, *HDAC11*, *USP12*, *L3MBTL2*, *MUM1* etc was also observed (Fig.  
263 6C). Further, differential expression patterns of several epigenetic modifiers at the MSC  
264 stage (day 0) were retained at the chondrocyte stage (day 21). For example, *ARID4B*,  
265 *BRD4*, *HDAC4*, *HDAC9*, *KDM5A*, *KMT2C* etc showed differential expression between  
266 OA- and AC-iMSCs at both day0 and day 21 stage of chondrogenic differentiation. These  
267 results suggest that differential expression of genes associated with energy metabolism  
268 and epigenetic regulation between healthy and OA conditions first occurs at the MSC  
269 stage, prior to their overt differentiation to the chondrogenic lineage. Thus, differences in  
270 the chondrogenic potential of AC- versus OA-iMSCs may be associated with differences  
271 in expression of metabolic and chromatin modifier genes which influence the  
272 chondrogenic capacity of these MSCs.

273 **Genetically distinct characteristic of AC- and OA-iMSCs were imprint of original**  
274 **cell sources from healthy and OA-chondrocytes:** Our data as above (Fig. 2A-E and  
275 Fig. 6A-C) indicated that although AC- and OA-iMSCs exhibit similar morphologic and  
276 immunophenotypic characteristics, they are genetically distinct populations that displayed  
277 varying efficiencies for chondrogenic differentiation. We therefore postulated that

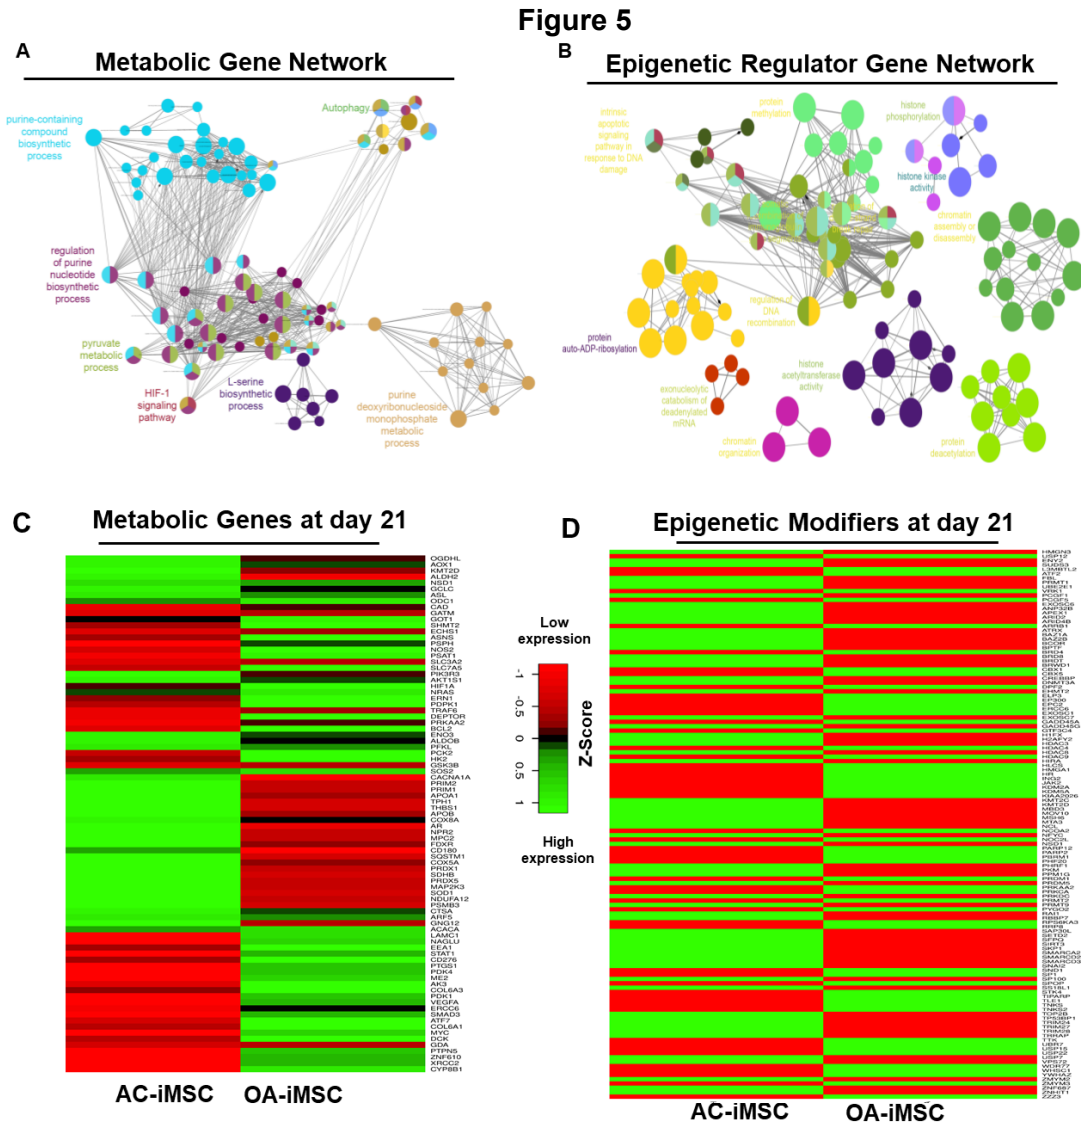

**Figure 5: Enrichment of metabolic and epigenetic regulators interaction networks during chondrogenic differentiation of AC-iMSCs:** (A, B) Interaction network analysis using DEGs at day 21 chondrogenic differentiation of AC- and OA-iMSCs. PPI network of differentially expressed genes in AC-iChondrocytes was constructed using STRING database and visualized by Cytoscape. Pathway enrichment analysis in the interaction network was performed using ClueGO analysis which showed enrichment of pathways related to (A) metabolic genes and (B) Epigenetic modifiers. Multiple nodes of metabolic and epigenetic regulators were enriched in these interaction networks suggesting the role of these pathways in differential chondrogenic potential. (C, D) Differential expression analyses of the genes involved in these enriched pathways related to energy metabolism and epigenetic regulators. The gene expression was visualized using Heatmap analysis for differentially expressed genes related to (C) energy metabolism and (D) epigenetic regulators. Expression values for each gene (row) were normalized across all samples (columns) by Z-score. Color key indicates the intensity associated with normalized expression values. Green shades indicate higher expression and red shades indicate lower expression.

The online version of this article includes the following source data for figure 5:

Figure 5-source data 1. Depicting original raw data related to Figure 5.

Figure 5-source data 2. Depicting original raw data related to Figure 5.

Figure 5-source data 3. Depicting original raw data related to Figure 5.

278 differences in the metabolic and chromatin modifier gene expression patterns observed

Figure 6

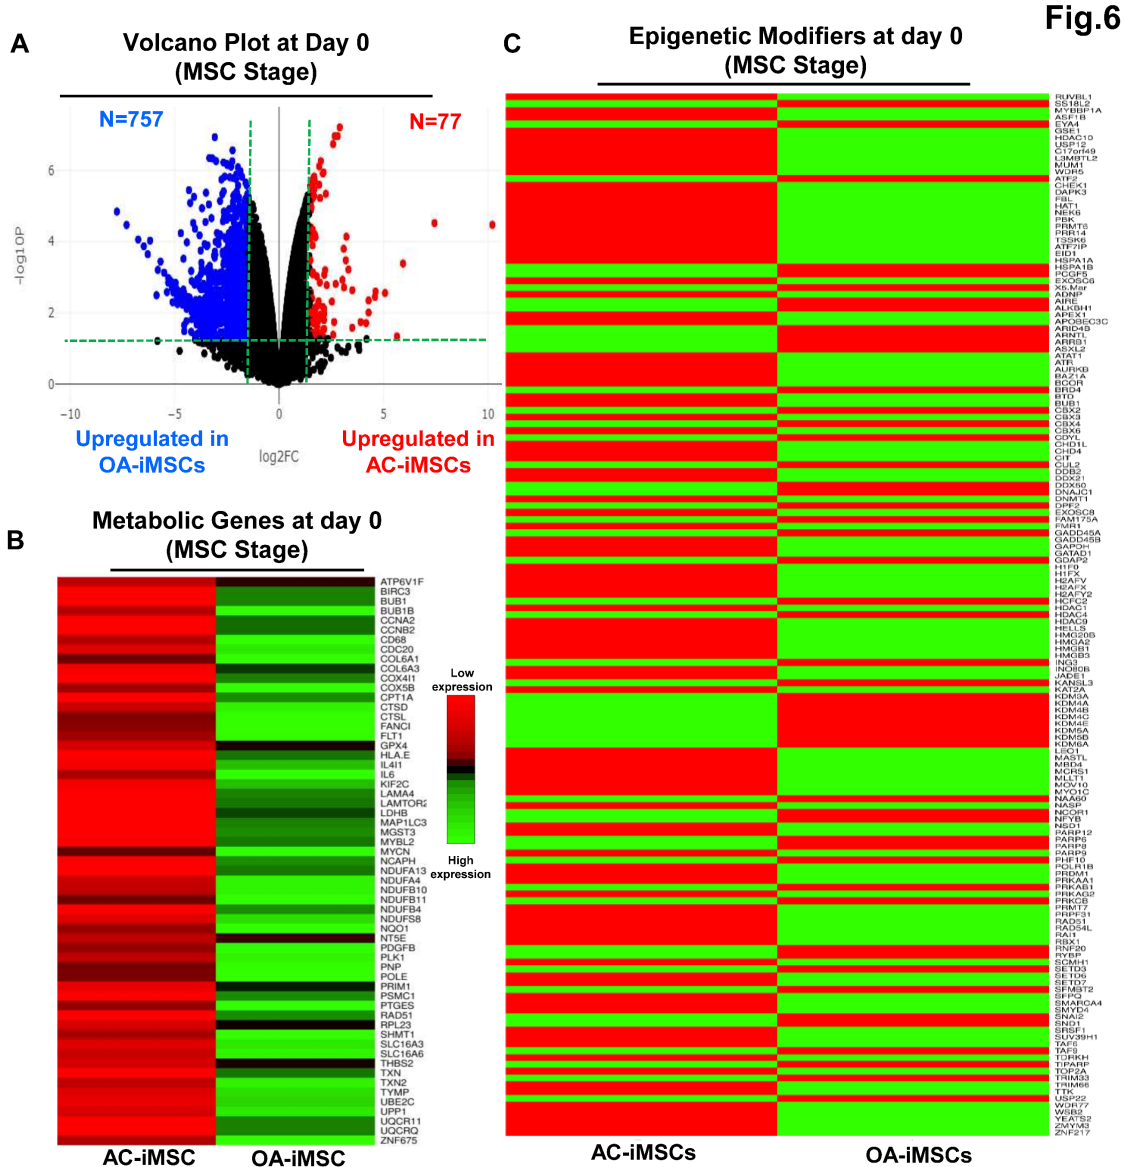

**Figure 6: AC-iMSCs at undifferentiated state showed distinct expression of genes involved in metabolic and epigenetic regulators: (A)** Differential gene expression analyses of AC- and OA-iMSCs at day 0 (start of chondrogenic differentiation) showing distinct transcriptomic signature. Genes with differential expression levels greater than 2-fold (FDR P value < 0.05) were visualized as volcano plot showing differential expression of 834 genes. **(B, C)** Pathway analysis was performed in 834 DEGs to show the enrichment of pathways related to metabolism and Epigenetic modifiers. Heatmap was used to show expression of the genes related to **(B)** energy metabolism and **(C)** epigenetic regulators. Expression values for each gene (row) were normalized across all samples (columns) by Z-score. Color key indicates the intensity associated with normalized expression values. Green shades indicate higher expression and red shades indicate lower expression.

The online version of this article includes the following source data for figure 6:

Figure 6-source data 1. Depicting original raw data related to Figure 6.

Figure 6-source data 2. Depicting original raw data related to Figure 6.

279 in OA-iMSCs as compared to AC-iMSCs are attributed to their initial disease status. To



290 *JDP2, ATF2, ATF7, WDR5* etc. which showed differentiation expression in healthy and  
 291 OA cartilage also showed retention of differential pattern in OA- vs AC-iMSCs. Together  
 292 our data suggest that a retained memory of disease during stem cell reprogramming  
 293 affected the chondrogenic differentiation potential of OA-iMSCs.

### Supplementary Figure 1

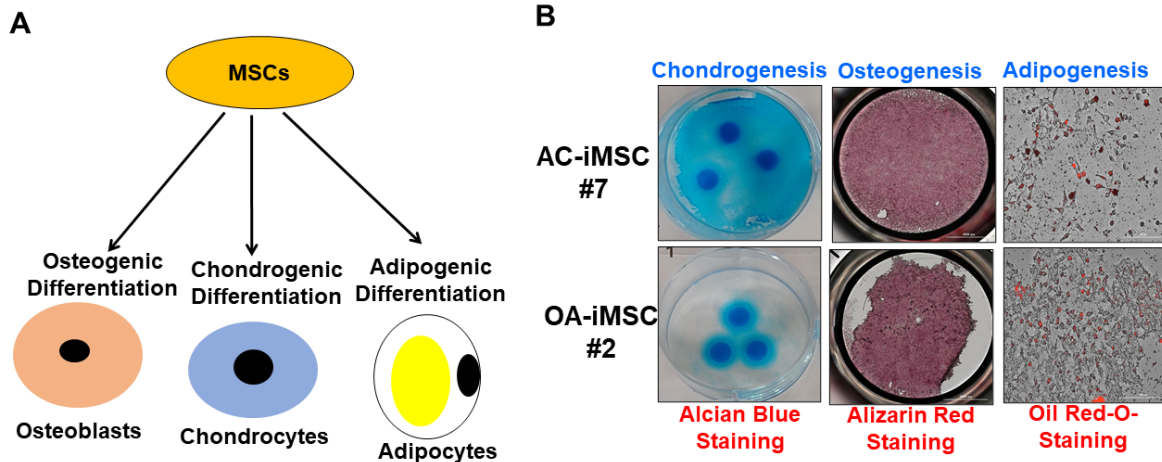

**Supplementary Figure 1:** (A) Trilineage differentiation of these AC- and OA-iMSCs using *in vitro* adipogenic, osteogenic, and chondrogenic differentiation assays. (B) Chondrocyte differentiation of AC- and OA-iMSCs was shown by Alcian blue staining of micromass cultures. Osteoblast differentiation was shown by Alizarin Red staining and Adipogenic differentiation was visualized using Oil Red O staining at day 21 culture. Scale bar, 100  $\mu$ m.

294  
 295  
 296  
 297  
 298  
 299  
 300  
 301  
 302  
 303  
 304  
 305  
 306  
 307  
 308

### Supplementary Figure 2

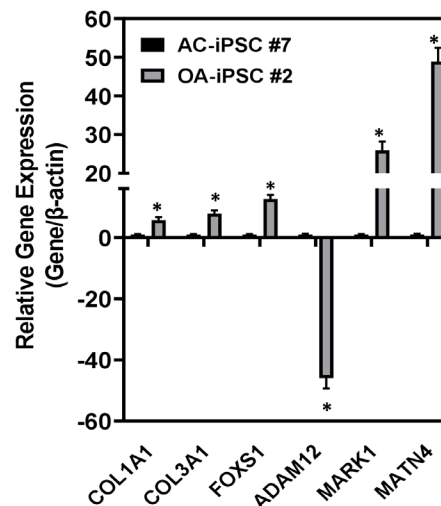

**Supplementary Figure 2:** Validation of RNA-Seq results by quantitative PCR. Select genes were chosen for further analysis and validation of the RNA-Seq results. RNAs were isolated from day 21 chondrogenic differentiation of AC- and OA-iMSCs.

309 **DISCUSSION:**

310 iPSCs are viewed as promising cell-based therapeutics for the repair of tissues  
311 lacking intrinsic regenerative capacity, including articular cartilage. Multiple studies have  
312 cautioned that safe and effective application of iPSCs based therapeutics will require  
313 careful consideration of the cellular origins of iPSCs.<sup>33 34</sup> Although reprogramming of  
314 somatic cells to iPSCs involves extensive modification of the epigenetic landscape, the  
315 reprogrammed cells can retain an epigenetic memory of the cell type of origin, thus  
316 affecting lineage differentiation propensity.<sup>5;10;35</sup> In addition to donor cell type, key  
317 questions over the influence of the health status of the parental somatic cells used for  
318 reprogramming remain unresolved. Thus, the present study was designed to determine  
319 whether the health status of donor human articular chondrocytes influences the  
320 regenerative potential of the derived iPSCs. Using iPSCs generated from healthy and OA  
321 chondrocytes, we report that reprogramming efficiency to pluripotency was largely  
322 equivalent between the two sources. However, OA-iPSCs showed a significantly reduced  
323 capacity for chondrogenic differentiation as compared to AC-iPSCs, indicating that the  
324 pathogenic condition of the donor chondrocytes negatively affected the chondrogenic  
325 differentiation potential of OA-iPSCs. Our data suggest that reprogramming does not  
326 reset the health status of OA articular chondrocytes, but rather supports the existence of  
327 a memory of disease in iPSCs derived from OA cartilage.

328 A plethora of studies over the last 15 years have determined that cells from almost  
329 any tissue can be used to generate human iPSCs, which can then be differentiated to a  
330 variety of specialized cells. However, human iPSCs generated from disparate cell types  
331 have not displayed equivalent capacities for differentiation to specialized cell types.<sup>10</sup>  
332 Seminal studies using iPSCs derived from myeloid cells, hematopoietic cells, and insulin-  
333 producing  $\beta$ -cells revealed a biased lineage differentiation attributed to residual DNA  
334 methylation signatures that influence cell fate commitment. For example, when compared  
335 to isogenic non-beta cell-derived iPSCs, beta cell-derived iPSCs maintained an open  
336 chromatin structure at key beta-cell genes, leading to an increased capacity to efficiently  
337 differentiate into insulin-producing cells.<sup>4</sup> Thus, iPSCs appear to have an epigenetic  
338 memory for the tissue of origin. We have previously generated iPSCs from multiple cell  
339 types including human skin fibroblasts, umbilical cord blood, and normal healthy  
340 chondrocytes using the same reprogramming strategy.<sup>13</sup> Using multiple chondrogenic  
341 differentiation assays, our earlier findings demonstrated that iPSC derived from  
342 chondrocytes showed enhanced matrix formation and chondrogenic gene expression,  
343 suggesting that the tissue of origin also impacted the chondrogenic potential of human  
344 iPSCs.<sup>13</sup> Similarly, a previous report also demonstrated the differential chondrogenic  
345 capabilities of iPSCs derived from dermal fibroblasts, peripheral blood mononuclear cells,  
346 cord blood mononuclear cells and OA fibroblast-like synoviocytes.<sup>8</sup>



347 Although it is now well-documented that the tissue of origin can affect the  
348 differentiation potential of iPSCs<sup>10</sup>, it is not known whether the health status of same  
349 tissue affects the regenerative potential of its derived iPSCs. A combination of genetic  
350 and non-genetic factors, including advanced age, mechanical trauma and inappropriate  
351 joint loading, and inflammation contribute to the development of OA.<sup>36-38</sup> It is well  
352 established that human OA articular chondrocytes exhibit phenotypic, functional and  
353 metabolic changes, as well as altered epigenetic patterns.<sup>39</sup> Thus, we speculated that a  
354 retained epigenetic memory of iPSCs is not only specific to the tissue of origin but also to  
355 the diseased status. Using pluripotency as a reliable tool, our novel data demonstrated  
356 significant differences in the chondrogenic capability of AC- vs OA-iPSCs. Our data  
357 indicate that OA cartilage derived iPSCs retained functional and molecular characteristics  
358 of OA pathogenesis. Chondrogenic pellets generated using OA-iPSCs showed relatively  
359 smaller size and reduced chondrogenic gene expression as compared to that from  
360 healthy iPSCs (AC-iPSCs) Expression of the trio of SOX genes (*SOX9*, *SOX5* and *SOX6*)  
361 was significantly lower in OA-iPSC-derived chondrogenic pellets. The expression of  
362 chondrogenic genes under control of *SOX9*, such as *COL2A1* and *ACAN* were also lower  
363 than that AC-iPSC-derived pellets. Since expression of *COL2A1* and *ACAN* are usually  
364 lower in OA cartilage, the finding of reduced chondrogenic genes in OA-iPSCs during  
365 chondrogenesis suggest the imprints of disease pathogenesis in OA-iPSCs. Similarly  
366 other cartilage matrix genes such as *COMP*, *MATN4*, *PRG4* and *COL11A2* were lower in  
367 OA-iPSC derived chondrocytes. Interestingly, expression of these genes was also  
368 reported to be decreased in OA<sup>40</sup> further suggesting the recapitulation of memory of  
369 disease in OA-iPSCs as compared to AC-iPSCs. Based on these findings, human stem  
370 cell models of OA using iPSCs may provide the unique opportunity to model OA disease  
371 changes, to uncover mechanisms of disease development, and to identify molecular  
372 targets for therapeutic intervention.

373 We next identified how a memory of cartilage pathology in OA is transmitted from  
374 the original somatic cells to iMSCs and finally to the chondrocytes. A nonbiased, high-  
375 throughput RNA-sequencing approach was used to define the pan transcriptome changes  
376 during iPSC stage-specific differentiation. Our global transcriptome data showed skewed  
377 expression of epigenetic regulators, and metabolism-associated molecular pathways in  
378 AC- vs OA-iMSCs, suggesting a transcriptional memory of disease mechanisms in OA-  
379 iPSCs. Recent studies showed cellular metabolism as a key driver of cell-fate changes  
380 which has intrinsic links with epigenetic modifications of chromatin during development,  
381 disease progression, and cellular reprogramming.<sup>41</sup> Our data suggests that AC- and OA-  
382 iMSCs differ in the expression of a plethora of metabolic genes which finally influence the  
383 cells metabolism and thus chondrogenic differentiation. While cell metabolism is closely  
384 linked to chondrogenic differentiation, in-depth metabolomic studies are needed to  
385 determine how metabolic heterogeneity of AC- and OA-iPSCs impact chondrogenic  
386 differentiation and regenerative potential of cartilage tissue. While recent discovery<sup>41</sup>

387 demonstrated the interaction between energy metabolite and epigenetic modifiers, a  
388 detailed future investigation warrants to determine how cellular metabolism wired the  
389 epigenetic modification and influence the cellular transitions associated with cartilage  
390 development.

391 Although an apparent memory of disease can impact the chondrogenic capabilities  
392 of OA-iPSCs, we did not detect differences in stemness genes between AC and OA lines.  
393 These data indicate that transcriptome level differences were notable only upon initial  
394 differentiation towards uncommitted mesenchymal progenitors (iMSC stage). We do not  
395 know whether the functional and molecular alteration in OA-iMSCs represent a transient  
396 or stable phenomenon. Functional studies, coupled with comprehensive analyses of  
397 epigenetic landscapes will be necessary to address whether the observed memory of  
398 disease (epigenetic and metabolic) is a stable imprint of the original cellular phenotypes,  
399 or could be erased by serial reprogramming. Moreover, does preservation of an  
400 epigenetic memory of cartilage disease in iPSCs occur at the DNA methylation level, and  
401 if so, what are the OA-associated loci? Further, it is not clear whether memory of disease  
402 is a phenomenon observed only at early passages after pluripotency induction or can be  
403 attenuated by continuous passaging.

404 In the present study, we addressed for the first time that differential chondrogenic  
405 potential of AC- and OA-iPSCs could be attributed to differences in transcriptome level  
406 changes in the epigenetic modifiers and energy metabolic genes. The expression profile  
407 of several chromatin modifiers belonging to the family of histone readers, writers, and  
408 erasers such as *FBL*, *PRMT1*, *UBE2E1*, *VRK1*, *PCGF1*, *USP12*, *HMGN3*, *HDAC3*,  
409 *HDAC8*, *BRDT*, *ARID2*, and *HMGN3* were significantly different between AC- and OA-  
410 iMSCs. In addition, several metabolic genes such as *AOX1*, *OGDHL*, *GATM*, *KMT2D*,  
411 *ALDH2*, *GOT1*, *SLC3A2* and *ECHS1* also showed differential expression pattern between  
412 AC- and OA-iMSCs. Several studies previously showed that metabolic genes and  
413 metabolites are involved in the regulation of histone acetylation and chromatin  
414 modification indicating that importance of chromatin and metabolites in physiological  
415 function of the cells.<sup>42;43</sup> Future studies using genome editing approaches coupled with  
416 metabolomics and chromatin mapping approaches will be required to determine the  
417 biological roles of these identified chromatin modifiers and metabolic regulators in  
418 chondrogenic differentiation of iMSCs. Further correlation of chondrogenic differentiation  
419 potential of iMSCs derived from chondrocytes from multiple donors, and with varying  
420 grades of OA severity will further help establish the concept of epigenetic memory of  
421 disease and determine the influence epigenetic and metabolic imprints on cartilage repair  
422 and regenerative medicine.

423  
424  
425

426 **MATERIALS AND METHODS:**

427 **Key resources table:**

| <b>Reagent type (species) or resource</b> | <b>Designation</b>                        | <b>Source or reference</b>                                                  | <b>Identifiers</b>       | <b>Additional Information</b> |
|-------------------------------------------|-------------------------------------------|-----------------------------------------------------------------------------|--------------------------|-------------------------------|
| Biological sample (Human)                 | AC-iPSCs                                  | Generated at corresponding author lab at UConn Health (Guzzo MR et al 2012) |                          |                               |
| Biological sample (Human)                 | OA-iPSC                                   | Generated at corresponding author lab at UConn Health                       |                          |                               |
| Biological sample (Human)                 | AC-iMSCs                                  | Derived from AC-iPSCs                                                       |                          |                               |
| Biological sample (Human)                 | OA-iPSC                                   | Derived from OA-iPSCs                                                       |                          |                               |
| Antibody                                  | FITC Mouse Anti-Human CD44                | BD-Biosciences                                                              | 347943, RRID:AB_400360   | 1:100 for Flow cytometry      |
| Antibody                                  | PE Mouse Anti-Human CD73                  | BD-Biosciences                                                              | 550257, RRID:AB_393561   | 1:100 for Flow cytometry      |
| Antibody                                  | FITC Mouse Anti-Human CD90                | BD-Biosciences                                                              | 555595, RRID:AB_395969   | 1:100 for Flow cytometry      |
| Antibody                                  | PE Mouse Anti-Human CD166                 | BD-Biosciences                                                              | 559263, RRID:AB_397210   | 1:100 for Flow cytometry      |
| Antibody                                  | FITC Mouse anti-Human CD105               | BD-Biosciences                                                              | 561443, RRID:AB_10714629 | 1:100 for Flow cytometry      |
| Antibody                                  | FITC Mouse Anti-Human CD31                | BD-Biosciences                                                              | 555445, RRID:AB_395838   | 1:100 for Flow cytometry      |
| Antibody                                  | FITC Mouse Anti-Human CD45                | BD-Biosciences                                                              | 347463, RRID:AB_400306   | 1:100 for Flow cytometry      |
| Antibody                                  | FITC Mouse IgG1, $\kappa$ Isotype Control | BD-Biosciences                                                              | 349041, RRID:AB_400397   | 1:100 for Flow cytometry      |

|                             |                                         |                                      |                         |                          |
|-----------------------------|-----------------------------------------|--------------------------------------|-------------------------|--------------------------|
| Antibody                    | PE Mouse IgG1, $\kappa$ Isotype Control | BD-Biosciences                       | 555749, RRID:AB_396091  | 1:100 for Flow cytometry |
| Commercial assay or kit     | High-capacity cDNA Reverse              | Transcription Kit Applied Biosystems | 4368814                 |                          |
| Commercial assay or kit     | Powerup SYBR green Mix                  | Thermo-Fisher                        | A25742                  |                          |
| Chemical compound and drugs | Trizol                                  | Thermo-Fisher                        | 15596026                |                          |
| Chemical compound and drugs | DMEM                                    | Thermo-Fisher                        | 11965092                |                          |
| Chemical compound and drugs | Recombinant Human FGF-basic             | Peprotech                            | 100-18B                 |                          |
| Chemical compound and drugs | Non-Essential Amino Acids Solution      | Thermo-Fisher                        | 11140050                |                          |
| Chemical compound and drugs | HyClone™ Fetal Bovine Sera Defined      | VWR                                  | 16777-006               |                          |
| Chemical compound and drugs | Pen Strep                               | Thermo-Fisher                        | 10378016                |                          |
| Chemical compound and drug  | L-Ascorbic Acid                         | Sigma                                | A4544                   |                          |
| Chemical compound and drug  | Glutamax 100 X                          | Gibco                                | 35050-061               |                          |
| Chemical compound and drug  | Dexamethasone                           | Sigma                                | D2915                   |                          |
| Chemical compound and drug  | L-Proline                               | Sigma                                | P0380                   |                          |
| Chemical compound and drug  | Insulin-Transferrin-Selenium            | Thermo-Fisher                        | 41400045                |                          |
| Software and algorithm      | Prism                                   | GraphPad                             | RRID:SCR_002798         |                          |
| Software and algorithm      | DESeq2                                  | Bioconductor                         | DESeq2, RRID:SCR_015687 |                          |

429 **iPS cell induction and culture:** We have previously described the generation iPSCs  
 430 reprogramming from human chondrocytes isolated from normal healthy cartilage (AC-  
 431 iPSCs).<sup>13</sup> These iPSCs were fully reprogrammed and detailed characterization of  
 432 pluripotency were performed previously using various methods including molecular,  
 433 cytochemical, cytogenic and *in vitro* and *in vivo* functional analyses.<sup>13</sup> Using similar  
 434 methods, we derived and characterized iPSCs from OA chondrocytes (OA-iPSCs). The  
 435 OA-iPSCs were generated at UConn Health with IRB approval. We procured surgical  
 436 discards from a 77-year-old female patient undergoing knee joint replacement surgery at  
 437 our clinic. Chondrocytes were harvested from remaining, OA-affected cartilage at the tibia  
 438 plateau. OA-derived iPSCs were generated using polycistronic STEMCAA lentiviral  
 439 vector (as described in our previous publication).

440 We used three clones from each of the AC-iPSCs (clone #7, #14, and # 15) and  
 441 OA-iPSC (clone #2, #5 and #8) to ensure that our data are not clone specific. The iPSC  
 442 colonies were maintained in undifferentiated pluripotent state by culturing the cells under  
 443 feeder free conditions on 0.1% Geltrex® (PeproTech) coated culture plates. For routine  
 444 expansion, iPSCs colonies were passaged after reaching 70% confluency using  
 445 treatment of ReLeSR™ reagent (StemCell Technologies) and cultured in new 6-well plate  
 446 using mTeSR™ plus medium supplemented with 10 μM Y-27,632 Rock inhibitor  
 447 (StemCell Technologies). Pluripotency of all lines was established by analyzing the  
 448 expressions of canonical stemness genes (*SOX2*, *NANOG*, *OCT4*, *KLF4*) using qPCR  
 449 assay as described previously.<sup>14</sup> Full list of primers is listed in Table 1. We also performed  
 450 immunofluorescence staining for pluripotency markers in these iPSC colonies using  
 451 Pluripotent Stem Cell 4-Marker Immunocytochemistry Kit (Thermo Fischer Scientific) as  
 452 per manufacturer’s instruction and fluorescence were imaged using fluorescence  
 453 microscopy (BioTek Lionheart LX Automated Microscope) as described previously.<sup>15</sup>  
 454 Alkaline phosphatase (ALP) staining was also performed for pluripotency characterization  
 455 using TRACP & ALP double-stain Kit (Takara) following manufacturer’s instructions. ALP-  
 456 positive colonies were imaged using Automated Microscope (BioTek Lionheart LX).

457 **Table 1: Primer Sequences**

| Genes                      | Forward Primer (5' → 3')   | Reverse Primer (5' → 3') |
|----------------------------|----------------------------|--------------------------|
| <i>OCT3/4</i> (NM_203289)  | TGTA CTCTCGGTCCCTTTC       | TCCAGGTTTTCTTCCCTAGC     |
| <i>NANOG</i> (NM_024865)   | CAGTCTGGACACTGGCTGAA       | CTCGCTGATTAGGCTCCAAC     |
| <i>KLF4</i> (NM_004235)    | TATGACCCACACTGCCAGAA       | TGGGA ACTTGACCATGATTG    |
| <i>SOX9</i> (NM_000346)    | AGACAGCCCCCTATCGACTT       | CGGCAGG TACTGGTCAA ACT   |
| <i>ACAN</i> (NM_013227)    | TCGAGGACAGCGAGGCC          | TCGAGGGTGTAGCGTGTAGAGA   |
| <i>COL2A1</i> (NM_001844)  | GGCAATAGCAGGTTACGTACA      | CGATAACAGTCTTGCCCCACTT   |
| <i>COL10A1</i> (NM_000493) | CAAGGCACCATCTCCAGGAA       | AAAGGGTATTTGTGGCAGCATATT |
| <i>ACTB</i> (NM_001101.5)  | CTC TTC CAG CCT TCC TTC CT | AGCACTGTG TTG GCGTAC AG  |

458

459 **Derivation of mesenchymal progenitor cells from AC- and OA-iPSCs:** Differentiation  
460 of iPSCs into chondrocytes requires an intermediate state which we termed as  
461 uncommitted mesenchymal progenitor cells or mesenchymal stem like cells (MSCs). The  
462 differentiation of iPSCs into MSCs was performed using our established direct plating  
463 method as described previously.<sup>16;17</sup> Briefly, cell suspensions of iPSC colonies (P15-17)  
464 were prepared using accutase treatment followed by seeding onto gelatin coated culture  
465 plate using MSC growth medium consisting of DMEM-High Glucose (Gibco), 10% defined  
466 fetal bovine serum (FBS; Hyclone), 1% nonessential amino acids (NEAA), 1X penicillin-  
467 streptomycin, and 5 ng/ml rhbFGF (Peprotech). After 2-3 passage onto non-coated  
468 plates, the heterogenous cultures acquired the iPSC-MSC-like homogenous, fibroblast-  
469 like morphology which was termed as iPSC derived MSCs (referred as iMSCs). For  
470 routine expansion, AC-iPSC, and OA-iPSC derived MSCs (AC-iMSCs and OA-iMSCs)  
471 were plated at density of  $0.3-0.4 \times 10^6$  cells per 100mm culture dish and maintained in  
472 MSC growth media. The characterization of the MSC like feature was performed using  
473 gene expression analysis of mesenchymal genes by qPCR assay as described  
474 previously.<sup>15</sup>

475 **Flow characterization of mesenchymal progenitor cells (iMSCs):**  
476 Immunophenotyping analysis for cell surface markers was performed as defined by the  
477 International Society for Cell & Gene Therapy (ISCT) for the minimal criteria of MSCs.<sup>18</sup>  
478 Surface staining of MSCs markers were performed using labeled anti-human antibody  
479 against CD73, CD95, CD105, CD44, CD45, CD31, CD29 using method described  
480 previously.<sup>19-21</sup> Isotype-matched control (IgG1-PE and IgG2b-FITC) were used for  
481 identifying nonspecific fluorescence. Cells were acquired using BD FACSAria™ using  
482 FACS Diva software (Becton–Dickinson). For each analysis, minimum of 20,000 cells  
483 was acquired and data was analyzed using FlowJo Software as described previously.<sup>15</sup>

484 **Chondrogenic differentiation of iMSCs:** We performed chondrogenic differentiation of  
485 iMSCs (P18-22) in 3D high density culture conditions using pellet suspension and  
486 micromass adherent method using our established protocol as described previously.  
487 <sup>13;16;17;22</sup> Briefly, for pellet culture, single cell suspension of AC-iMSCs and OA-iMSCs  
488 culture was performed using 0.25% Trypsin-EDTA and  $0.5 \times 10^6$  cells were placed in 15-  
489 ml polypropylene tubes and centrifuged at 300g for 5 minutes to pellet the cells, and finally  
490 cultured in MSC growth medium in CO<sub>2</sub> incubator at 37°C and 5% CO<sub>2</sub> for 1 day. Twenty-  
491 four hours after pellet formation, the culture media was replaced with chondrogenic media  
492 consisting of DMEM-High Glucose media (Gibco), 1% ITS+ premix, 40 µg/ml L-proline,  
493 1mM sodium pyruvate, 1X nonessential amino acids, 1X Glutamax, 50 µg/ml ascorbic  
494 acid 2-phosphate, and 0.1µM dexamethasone, 1X-penicillin/streptomycin and human  
495 recombinant BMP-2 (100 ng/ml, Peprotech).<sup>16</sup> Chondrogenic media and growth factor  
496 were changed every other day until the end of 21 days of chondrogenic differentiation.  
497 Cell pellets were harvested at 0, 7, 14 and 21 days of differentiation and analyzed for  
498 gene expression using SYBR™Green qPCR assay.

499 Chondrogenic differentiation was also performed using adherent micromass  
500 method.<sup>16</sup> The micromass of AC-iMSCs and OA-iMSCs was prepared by culturing the  
501 cells in high density ( $25 \times 10^4$  cells per 10 $\mu$ l drop) in 6-well culture plates. Immediately  
502 after seeding the micromasses, MSC growth medium was carefully added dropwise from  
503 the edges of the plate to prevent dehydration of micromass. These micromasses were  
504 incubated for 4-6 hrs at 37°C in 5% CO<sub>2</sub>, and then supplemented with 2 ml of MSC growth  
505 medium and cultured for 24 hrs. Then MSC growth media was replaced with  
506 chondrogenic media and differentiation was continued for 21 days. Micromass culture  
507 were harvested at different days of chondrogenic differentiation and processed for either  
508 RNA isolation or fixed with formalin for Alcian blue staining. Formalin-fixed micromass  
509 cultures were stained with 1% Alcian Blue in acetic acid, pH 2.5 and proteoglycans levels  
510 were measured by imaging the blue colonies using automated microscope (BioTek  
511 Lionheart LX).

512 **Osteogenic and Adipogenic differentiation of iMSCs:** To establish the multilineage  
513 potential of the iMSCs, we next assessed the ability of AC- and OA-iMSCs to differentiate  
514 into osteogenic and adipogenic lineages *in vitro*. Osteogenesis of iMSCs was induced by  
515 culturing 10,000 cells per well of 24-well plate using osteogenic medium consisting of  
516 DMEM supplemented with 1mM sodium pyruvate, 0.1 $\mu$ M dexamethasone, 50  $\mu$ g/ml  
517 ascorbic acid 2-phosphate, 10mM  $\beta$ -glycerophosphate, 10% FBS and 1X  
518 penicillin/streptomycin for 21 days. At end of 21 days culture, cells were fixed with formalin  
519 and stained for Alizarin Red solution to visualize calcium deposits as described  
520 previously.<sup>13;16;17</sup>

521 Additionally, to induce adipogenesis, the iMSCs were seeded at 10,000 cells per  
522 well in 24-well plate and cultured for 21 days in presence of adipogenic media consisting  
523 of DMEM-high glucose supplemented with 10% FBS, 1mM sodium pyruvate, 1 $\mu$ M  
524 dexamethasone, 10  $\mu$ g/ml insulin, 0.5mM isobutylmethylxanthine, 200 $\mu$ M indomethacin  
525 and 1X penicillin/streptomycin. Adipogenesis was measured by Oil-red-O staining of  
526 formalin fixed cells for detection of lipid accumulation as described previously.<sup>13;16;17</sup>

527 **RNA-sequencing of iMSCs during chondrogenic differentiation:** To examine the  
528 transcriptional changes during chondrogenic differentiation using the pellet method, we  
529 performed RNA-sequencing of AC- and OA-iMSCs during the course of differentiation  
530 process. Pellets from both AC- and OA-iMSCs were isolated at 0, 7, 14 and 21 days of  
531 chondrogenic differentiation and total RNA was isolated using miRNeasy Kits. On-  
532 Column DNase digestion was performed to remove genomic DNA contamination. RNA  
533 quality was checked using Nanodrop and the RNA integrity was determined by Agilent  
534 2200 Bioanalyzer, and the RNA integrity Number (RIN) values were >7 for all samples.  
535 Libraries were prepared from 250 ng RNA using TruSeq Stranded Total RNA Sample  
536 Prep Kit (Illumina) using the Poly A enrichment method. Sequencing was carried out using  
537 the NovaSeq PE 150 system (Novogene UC Davis Sequencing Center, Novogene

538 Corporation Inc.). Raw data were exported in FASTQ (fq) format and quality control was  
539 performed for error rate and GC content distribution, and data filtering was performed to  
540 remove low quality reads or reads with adaptors. The clean reads were mapped to human  
541 reference genome (GRCh38) and differential gene expression (DEGs) analysis was  
542 performed using DESeq2 method and pairwise gene expression levels were calculated  
543 using RPKM (Read per kilobase of transcript sequence per millions base pairs  
544 sequenced) value. FC (Fold Change) in gene expression was performed on filtered data  
545 sets using normalized signal values.

546 **Differential gene expression analysis of RNA-Seq data:** Differentially expressed  
547 genes (DEG) were identified using DESeq2 in R Bioconductor.<sup>23</sup> Log fold change (FC)  
548 represented the fold change of gene expression, and  $P < .05$  and  $\log_2FC > 2$  was set for  
549 statistically significant DEGs. Multiple correction testing was performed using False  
550 Discovery Rate (FDR). The DEGs between AC- and OA-iMSCs at Day 21 were visualized  
551 using heatmap, volcano plot and principal component analysis (PCA) using R-  
552 Bioconductor package as described previously.<sup>15;24-26</sup> Molecular pathways enriched in  
553 DEGs was performed using GO (Gene Ontology) and KEGG pathways analysis using  
554 STRING (v11.0).<sup>27</sup> The enrichment of top GO terms based on FDR corrected p-value was  
555 visualized by dot plot analysis as described previously.<sup>25;26</sup> X-axis in the dot plot  
556 represents 'gene term ratio', which was calculated by ratio of gene numbers enriched in  
557 a particular GO term to all the gene numbers annotated in that GO term.

558 We also performed differential gene expression analysis between healthy and OA  
559 chondrocytes by analyzing the publicly available RNA-seq datasets. The raw data were  
560 downloaded from healthy and OA cartilage tissues (GSE114007) available from the  
561 NCBI-GEO database.<sup>28</sup> DEGs were identified using DESeq2 in R Bioconductor as  
562 described above. The heatmap for mRNA expression profiling of selected genes was  
563 generated by R package of pheatmap as described previously.<sup>26</sup>

564 **Interaction network analysis of DEGs between AC- and OA-iMSCs:** To identify the  
565 interactions among top DEGs between AC- and OA-iMSCs during chondrogenic  
566 differentiation, we performed interaction network analyses using STRING database  
567 (v11.0) using a stringent criterion with a combined score of  $> 0.7$  showing most significant  
568 interactions.<sup>27</sup> Network clusters were identified using connectivity degree and hub  
569 proteins were identified as node showing maximum clustering score in the interaction  
570 network. The interaction network was visualized by the Cytoscape (v3.9.0), a  
571 bioinformatics package for biological network visualization and data integration<sup>29</sup> as  
572 described previously.<sup>25;26</sup> Significant clusters in the interaction network were analyzed by  
573 sub-network analysis using the Molecular Complex Detection Algorithm (MCODE) plugin  
574 (v1.5.1) in Cytoscape.<sup>30</sup> Enrichment of molecular pathways in identified network cluster  
575 was analyzed using ClueGO analysis in Cytoscape.<sup>31</sup> The genes identified in metabolic



576 and epigenetic regulator pathways in network clusters were also analyzed for differential  
577 expression analysis between AC- and OA-iMSCs and visualized by heatmap analysis.

578 **Statistics:** Data are expressed as mean  $\pm$  SEM of at least three independent  
579 experiments. All experiments represent biological replicates and were repeated at least  
580 three times, unless otherwise stated. Technical replicates are repeat tests of the same  
581 value, i.e., testing same samples in triplicate for qPCR. Biological replicates are samples  
582 derived from separate sources, such as different clones of iPSCs and iMSCs. Statistical  
583 comparisons between two groups (AC- vs OA-) were performed using a two-tailed  
584 Student's t-test for comparing two groups using GraphPad Prism. One-way ANOVA  
585 followed by Tukey's test multiple comparisons test for greater than two groups  
586 Significance was denoted at  $P < 0.05$ .

587

#### 588 **AUTHOR CONTRIBUTIONS:**

589 H.D., R.M.G. and N.M.K. conceived the study and designed the project; N.M.K., M.E.D.H.  
590 S.C. P.P. performed the experiments; R.M.G. generated the iPSCs; N.M.K. drafted the  
591 manuscript; H.D., P.B., and R.M.G. critically reviewed the manuscript. All authors  
592 provided the final approval for this manuscript.

593

594 **FUNDING:** This research was funded by Georgia CTSA/REM Pilot Project 00080502 to  
595 H.D. and L.J.M., Veteran Affairs CaReAP Award (I01-BX004878) to H.D. and Connecticut  
596 Innovation Stem Cell Fund Seed Grants (#13-SCA-UCHC-11, #10SCA36) to R.G.

597

598 **ACKNOWLEDGEMENTS:** This work was supported by Georgia and funds from Veteran  
599 Affairs and Emory University School of Medicine.

600

601 **CONFLICTS OF INTEREST:** The authors declare no conflict of interest.

602

603 **DATA AVAILABILITY:** All raw data has been made available as source data files within  
604 the manuscript. The sequencing datasets are available via the Gene Expression Omnibus  
605 (GEO) under the accession numbers GSE 214987.

606

607 Nazir M Khan and Hicham Drissi, 2022, NCBI Gene Expression Omnibus ID GSE214987.  
608 RNA-seq during chondrocyte differentiation of iMSCs derived from iPSCs of healthy (AC-  
609 iPSCs) and OA chondrocytes (OA-iPSCs)

610 <https://www.ncbi.nlm.nih.gov/geo/query/acc.cgi?acc=GSE214987>

611

612

613

614

615 **REFERENCES:**

616

- 617 1. Lotz MK, Kraus VB. New developments in osteoarthritis. Posttraumatic  
618 osteoarthritis: pathogenesis and pharmacological treatment options. *Arthritis Res*  
619 *Ther.* 2010;12(3):211.
- 620 2. Lach MS, Rosochowicz MA, Richter M, Jagiełło I, Suchorska WM, Trzeciak T. The  
621 Induced Pluripotent Stem Cells in Articular Cartilage Regeneration and Disease  
622 Modelling: Are We Ready for Their Clinical Use? *Cells.* 2022;11(3).
- 623 3. Lietman SA. Induced pluripotent stem cells in cartilage repair. *World J Orthop.*  
624 2016;7(3):149-155.
- 625 4. Bar-Nur O, Russ HA, Efrat S, Benvenisty N. Epigenetic memory and preferential  
626 lineage-specific differentiation in induced pluripotent stem cells derived from  
627 human pancreatic islet beta cells. *Cell Stem Cell.* 2011;9(1):17-23.
- 628 5. Kim K, Doi A, Wen B, et al. Epigenetic memory in induced pluripotent stem cells.  
629 *Nature.* 2010;467(7313):285-290.
- 630 6. Lister R, Pelizzola M, Kida YS, et al. Hotspots of aberrant epigenomic  
631 reprogramming in human induced pluripotent stem cells. *Nature.*  
632 2011;471(7336):68-73.
- 633 7. Ohi Y, Qin H, Hong C, et al. Incomplete DNA methylation underlies a  
634 transcriptional memory of somatic cells in human iPS cells. *Nat Cell Biol.*  
635 2011;13(5):541-549.
- 636 8. Rim YA, Nam Y, Park N, et al. Different Chondrogenic Potential among Human  
637 Induced Pluripotent Stem Cells from Diverse Origin Primary Cells. *Stem Cells Int.*  
638 2018;2018:9432616.
- 639 9. Marinkovic M, Block TJ, Rakian R, et al. One size does not fit all: developing a cell-  
640 specific niche for in vitro study of cell behavior. *Matrix Biol.* 2016;52-54:426-441.
- 641 10. Kim K, Zhao R, Doi A, et al. Donor cell type can influence the epigenome and  
642 differentiation potential of human induced pluripotent stem cells. *Nat Biotechnol.*  
643 2011;29(12):1117-1119.
- 644 11. Choompoo N, Bartley OJM, Precious SV, et al. Induced pluripotent stem cells  
645 derived from the developing striatum as a potential donor source for cell  
646 replacement therapy for Huntington disease. *Cytotherapy.* 2021;23(2):111-118.
- 647 12. Wang L, Hiler D, Xu B, et al. Retinal Cell Type DNA Methylation and Histone  
648 Modifications Predict Reprogramming Efficiency and Retinogenesis in 3D  
649 Organoid Cultures. *Cell Rep.* 2018;22(10):2601-2614.
- 650 13. Guzzo RM, Scanlon V Fau - Sanjay A, Sanjay A Fau - Xu R-H, Xu Rh Fau - Drissi  
651 H, Drissi H. Establishment of human cell type-specific iPS cells with enhanced  
652 chondrogenic potential. (2629-3277 (Electronic)).
- 653 14. Khan NM, Haseeb A, Ansari MY, Devarapalli P, Haynie S, Haqqi TM. Wogonin, a  
654 plant derived small molecule, exerts potent anti-inflammatory and  
655 chondroprotective effects through the activation of ROS/ERK/Nrf2 signaling  
656 pathways in human Osteoarthritis chondrocytes. (1873-4596 (Electronic)).
- 657 15. Diaz-Hernandez ME, Khan NM, Trochez CM, et al. Derivation of notochordal cells  
658 from human embryonic stem cells reveals unique regulatory networks by single  
659 cell-transcriptomics. (1097-4652 (Electronic)).

- 660 16. Guzzo RM, Drissi H. Differentiation of Human Induced Pluripotent Stem Cells to  
661 Chondrocytes. (1940-6029 (Electronic)).
- 662 17. Guzzo RM, Gibson J Fau - Xu R-H, Xu Rh Fau - Lee FY, Lee Fy Fau - Drissi H,  
663 Drissi H. Efficient differentiation of human iPSC-derived mesenchymal stem cells  
664 to chondroprogenitor cells. (1097-4644 (Electronic)).
- 665 18. Dominici M, Le Blanc K Fau - Mueller I, Mueller I Fau - Slaper-Cortenbach I, et al.  
666 Minimal criteria for defining multipotent mesenchymal stromal cells. The  
667 International Society for Cellular Therapy position statement. (1465-3249 (Print)).
- 668 19. Khan NM, Poduval TB. Immunomodulatory and immunotoxic effects of bilirubin:  
669 molecular mechanisms. (1938-3673 (Electronic)).
- 670 20. Khan NM, Poduval TB. Bilirubin augments radiation injury and leads to increased  
671 infection and mortality in mice: molecular mechanisms. (1873-4596 (Electronic)).
- 672 21. Khan NM, Sandur Sk Fau - Checker R, Checker R Fau - Sharma D, Sharma D  
673 Fau - Poduval TB, Poduval Tb Fau - Sainis KB, Sainis KB. Pro-oxidants ameliorate  
674 radiation-induced apoptosis through activation of the calcium-ERK1/2-Nrf2  
675 pathway. (1873-4596 (Electronic)).
- 676 22. Drissi H, Gibson JD, Guzzo RM, Xu RH. Derivation and Chondrogenic  
677 Commitment of Human Embryonic Stem Cell-Derived Mesenchymal Progenitors.  
678 (1940-6029 (Electronic)).
- 679 23. Love MI, Huber W, Anders S. Moderated estimation of fold change and dispersion  
680 for RNA-seq data with DESeq2. *Genome Biol.* 2014;15(12):550.
- 681 24. Fernandes LM, Khan NM, Trochez CM, et al. Single-cell RNA-seq identifies unique  
682 transcriptional landscapes of human nucleus pulposus and annulus fibrosus cells.  
683 (2045-2322 (Electronic)).
- 684 25. Khan NM, Clifton KB, Lorenzo J, Hansen MF, Drissi H. Comparative transcriptomic  
685 analysis identifies distinct molecular signatures and regulatory networks of  
686 chondroclasts and osteoclasts. (1478-6362 (Electronic)).
- 687 26. Khan NM, Diaz-Hernandez ME, Presciutti SA-O, Drissi H. Network Analysis  
688 Identifies Gene Regulatory Network Indicating the Role of RUNX1 in Human  
689 Intervertebral Disc Degeneration. LID - 10.3390/genes11070771 [doi] LID - 771.  
690 (2073-4425 (Electronic)).
- 691 27. Szklarczyk D, Morris JH, Cook H, et al. The STRING database in 2017: quality-  
692 controlled protein-protein association networks, made broadly accessible. (1362-  
693 4962 (Electronic)).
- 694 28. Fisch KM, Gamini R, Alvarez-Garcia O, et al. Identification of transcription factors  
695 responsible for dysregulated networks in human osteoarthritis cartilage by global  
696 gene expression analysis. (1522-9653 (Electronic)).
- 697 29. Otasek D, Morris JH, Bouças J, Pico AR, Demchak B. Cytoscape Automation:  
698 empowering workflow-based network analysis. *Genome Biol.* 2019;20(1):185.
- 699 30. Saito R, Smoot ME, Ono K, et al. A travel guide to Cytoscape plugins. *Nat*  
700 *Methods.* 2012;9(11):1069-1076.
- 701 31. Bindea G, Mlecnik B, Hackl H, et al. ClueGO: a Cytoscape plug-in to decipher  
702 functionally grouped gene ontology and pathway annotation networks.  
703 *Bioinformatics.* 2009;25(8):1091-1093.
- 704 32. Daniels K, Reiter R Fau - Solursh M, Solursh M. Micromass cultures of limb and  
705 other mesenchyme. (0091-679X (Print)).

- 706 33. Polo JM, Liu S, Figueroa ME, et al. Cell type of origin influences the molecular and  
707 functional properties of mouse induced pluripotent stem cells. *Nat Biotechnol.*  
708 2010;28(8):848-855.
- 709 34. Hu S, Zhao MT, Jahanbani F, et al. Effects of cellular origin on differentiation of  
710 human induced pluripotent stem cell-derived endothelial cells. *JCI Insight.*  
711 2016;1(8).
- 712 35. Poetsch MS, Strano A, Guan K. Human induced pluripotent stem cells: From cell  
713 origin, genomic stability and epigenetic memory to translational medicine. *Stem*  
714 *Cells.* 2022.
- 715 36. Goldring MB, Otero M. Inflammation in osteoarthritis. *Curr Opin Rheumatol.*  
716 2011;23(5):471-478.
- 717 37. Loeser RF, Goldring SR, Scanzello CR, Goldring MB. Osteoarthritis: a disease of  
718 the joint as an organ. *Arthritis Rheum.* 2012;64(6):1697-1707.
- 719 38. Martel-Pelletier J, Barr AJ, Cicuttini FM, et al. Osteoarthritis. *Nat Rev Dis Primers.*  
720 2016;2:16072.
- 721 39. Izda V, Martin J, Sturdy C, Jeffries MA. DNA methylation and noncoding RNA in  
722 OA: Recent findings and methodological advances. *Osteoarthr Cartil Open.*  
723 2021;3(4).
- 724 40. Sofat N. Analysing the role of endogenous matrix molecules in the development of  
725 osteoarthritis. *Int J Exp Pathol.* 2009;90(5):463-479.
- 726 41. Wu J, Ocampo A, Belmonte JCI. Cellular Metabolism and Induced Pluripotency.  
727 *Cell.* 2016;166(6):1371-1385.
- 728 42. Jo C, Park S, Oh S, et al. Histone acylation marks respond to metabolic  
729 perturbations and enable cellular adaptation. *Exp Mol Med.* 2020;52(12):2005-  
730 2019.
- 731 43. Schwartzman JM, Thompson CB, Finley LWS. Metabolic regulation of chromatin  
732 modifications and gene expression. *J Cell Biol.* 2018;217(7):2247-2259.

733

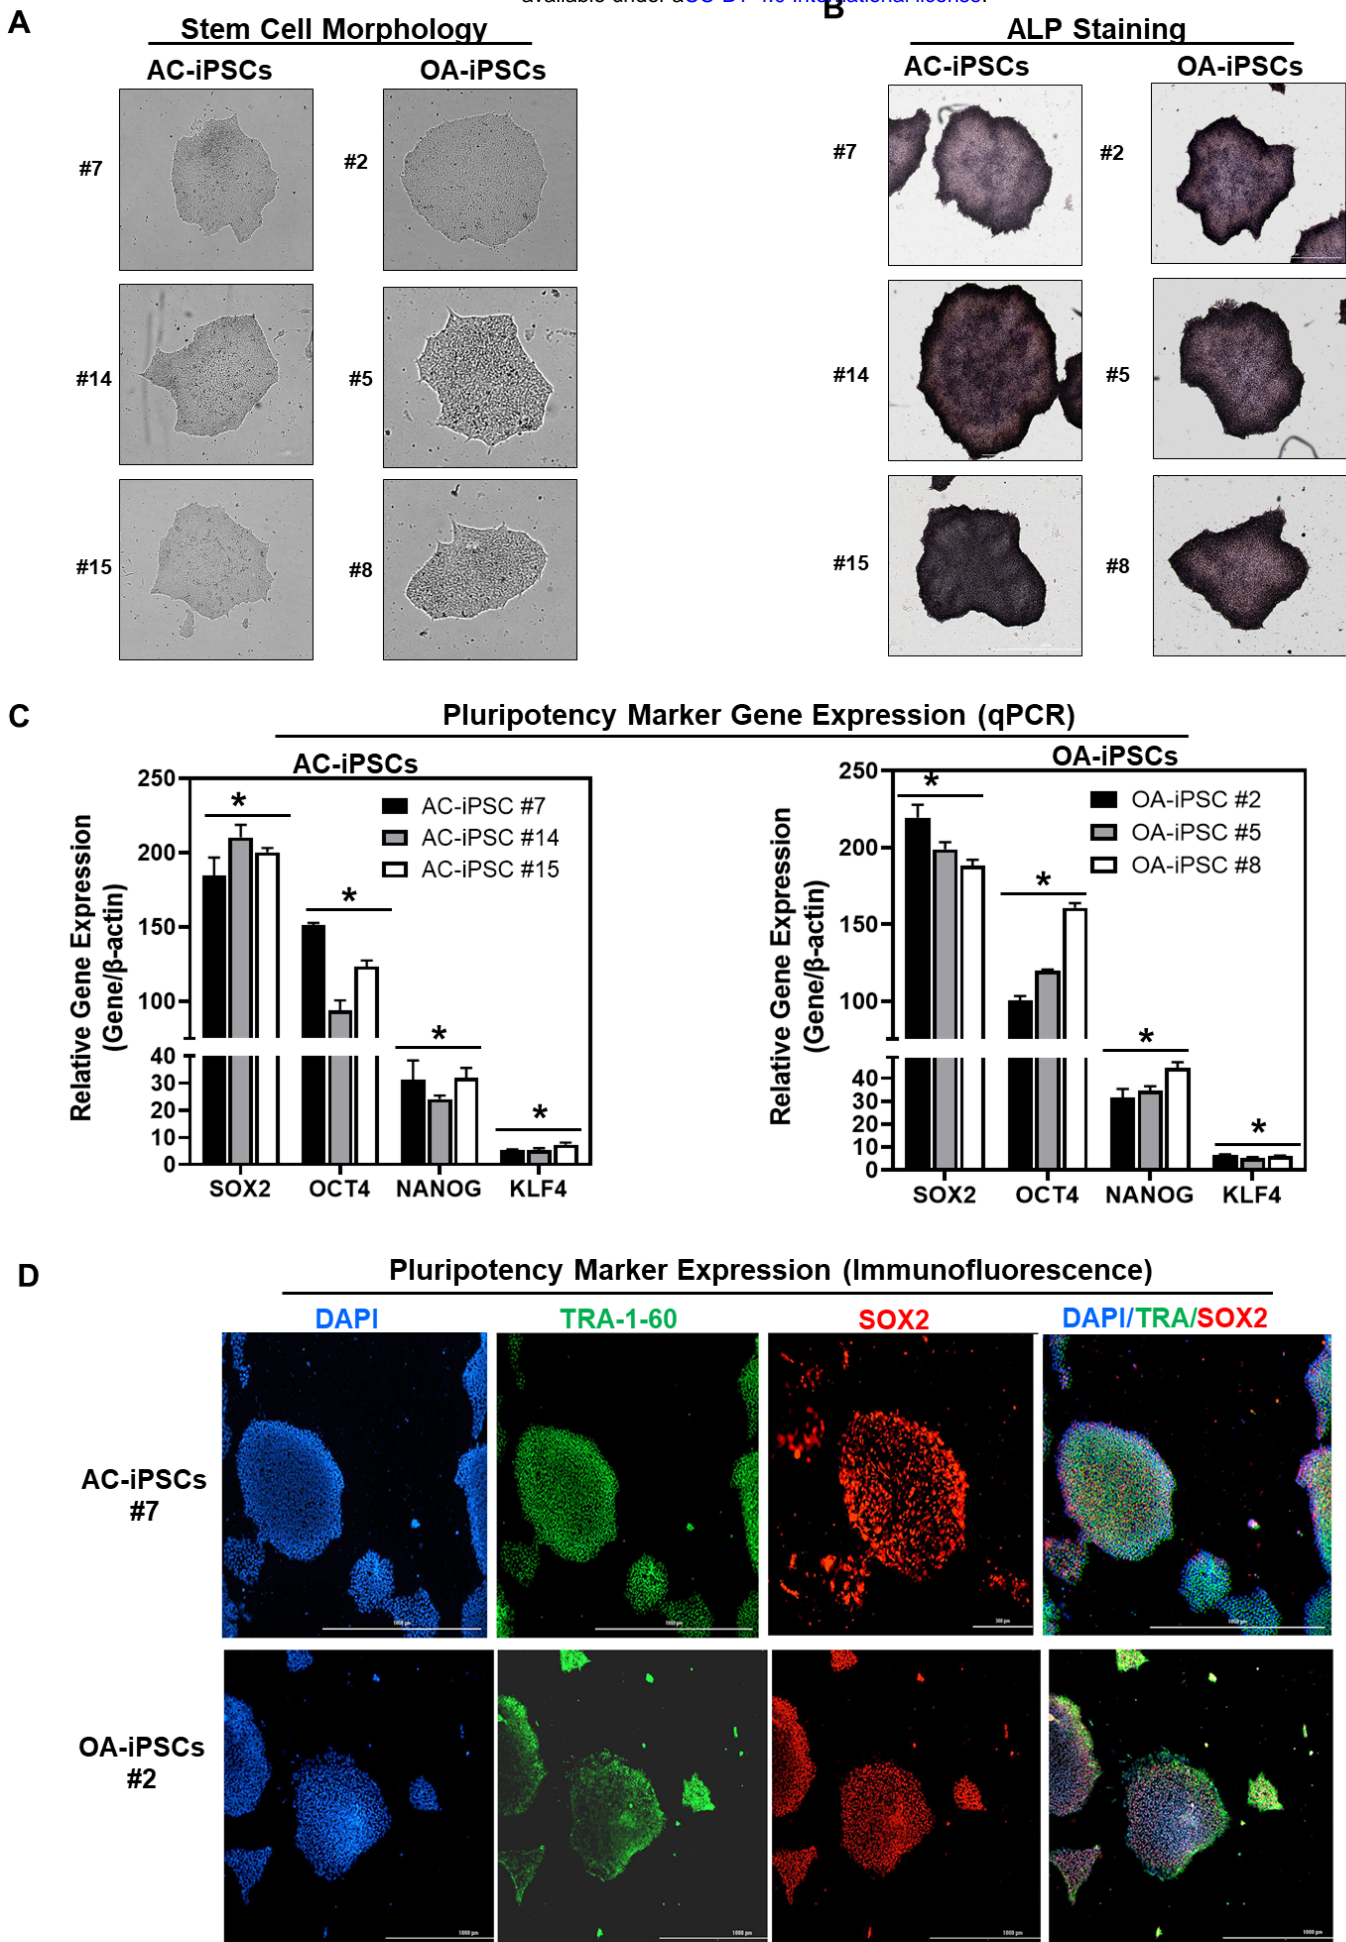

**Fig.2**

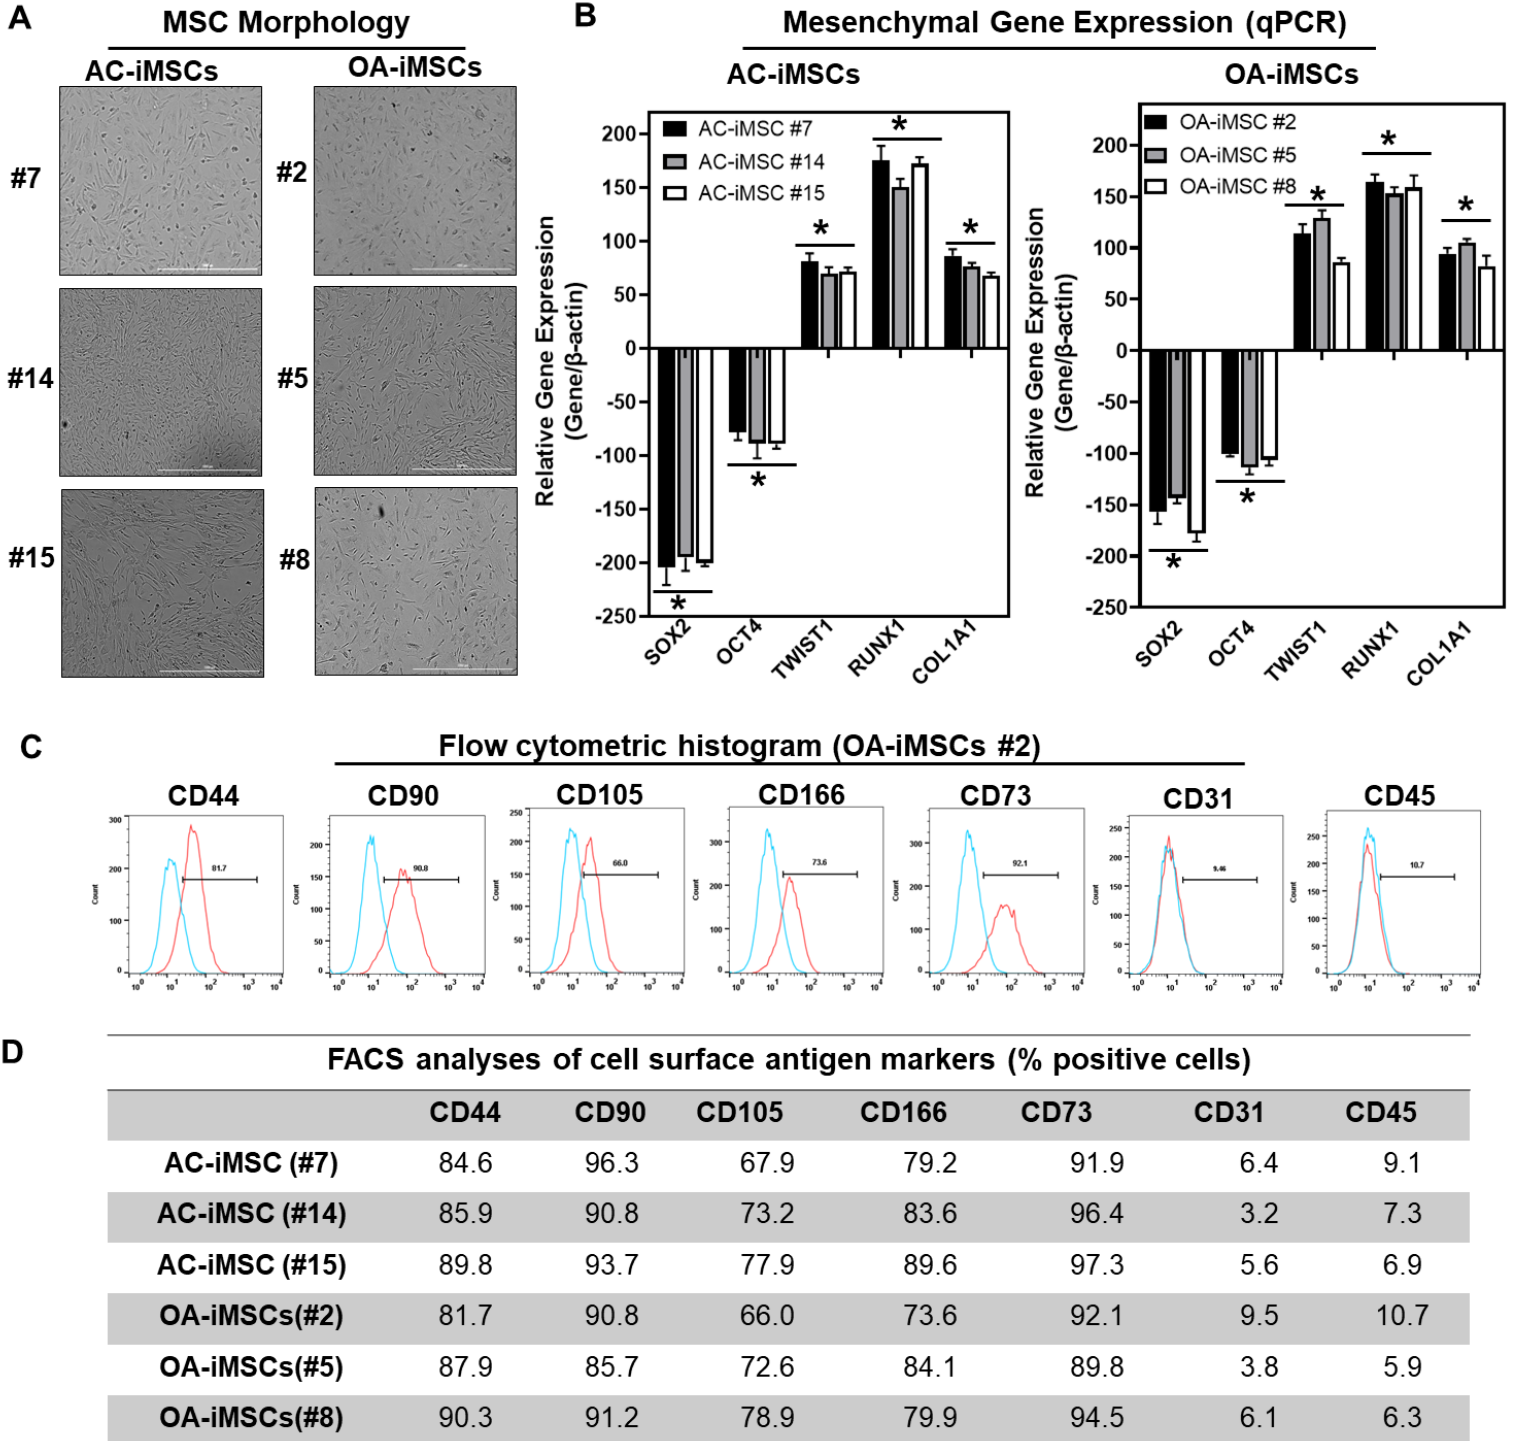

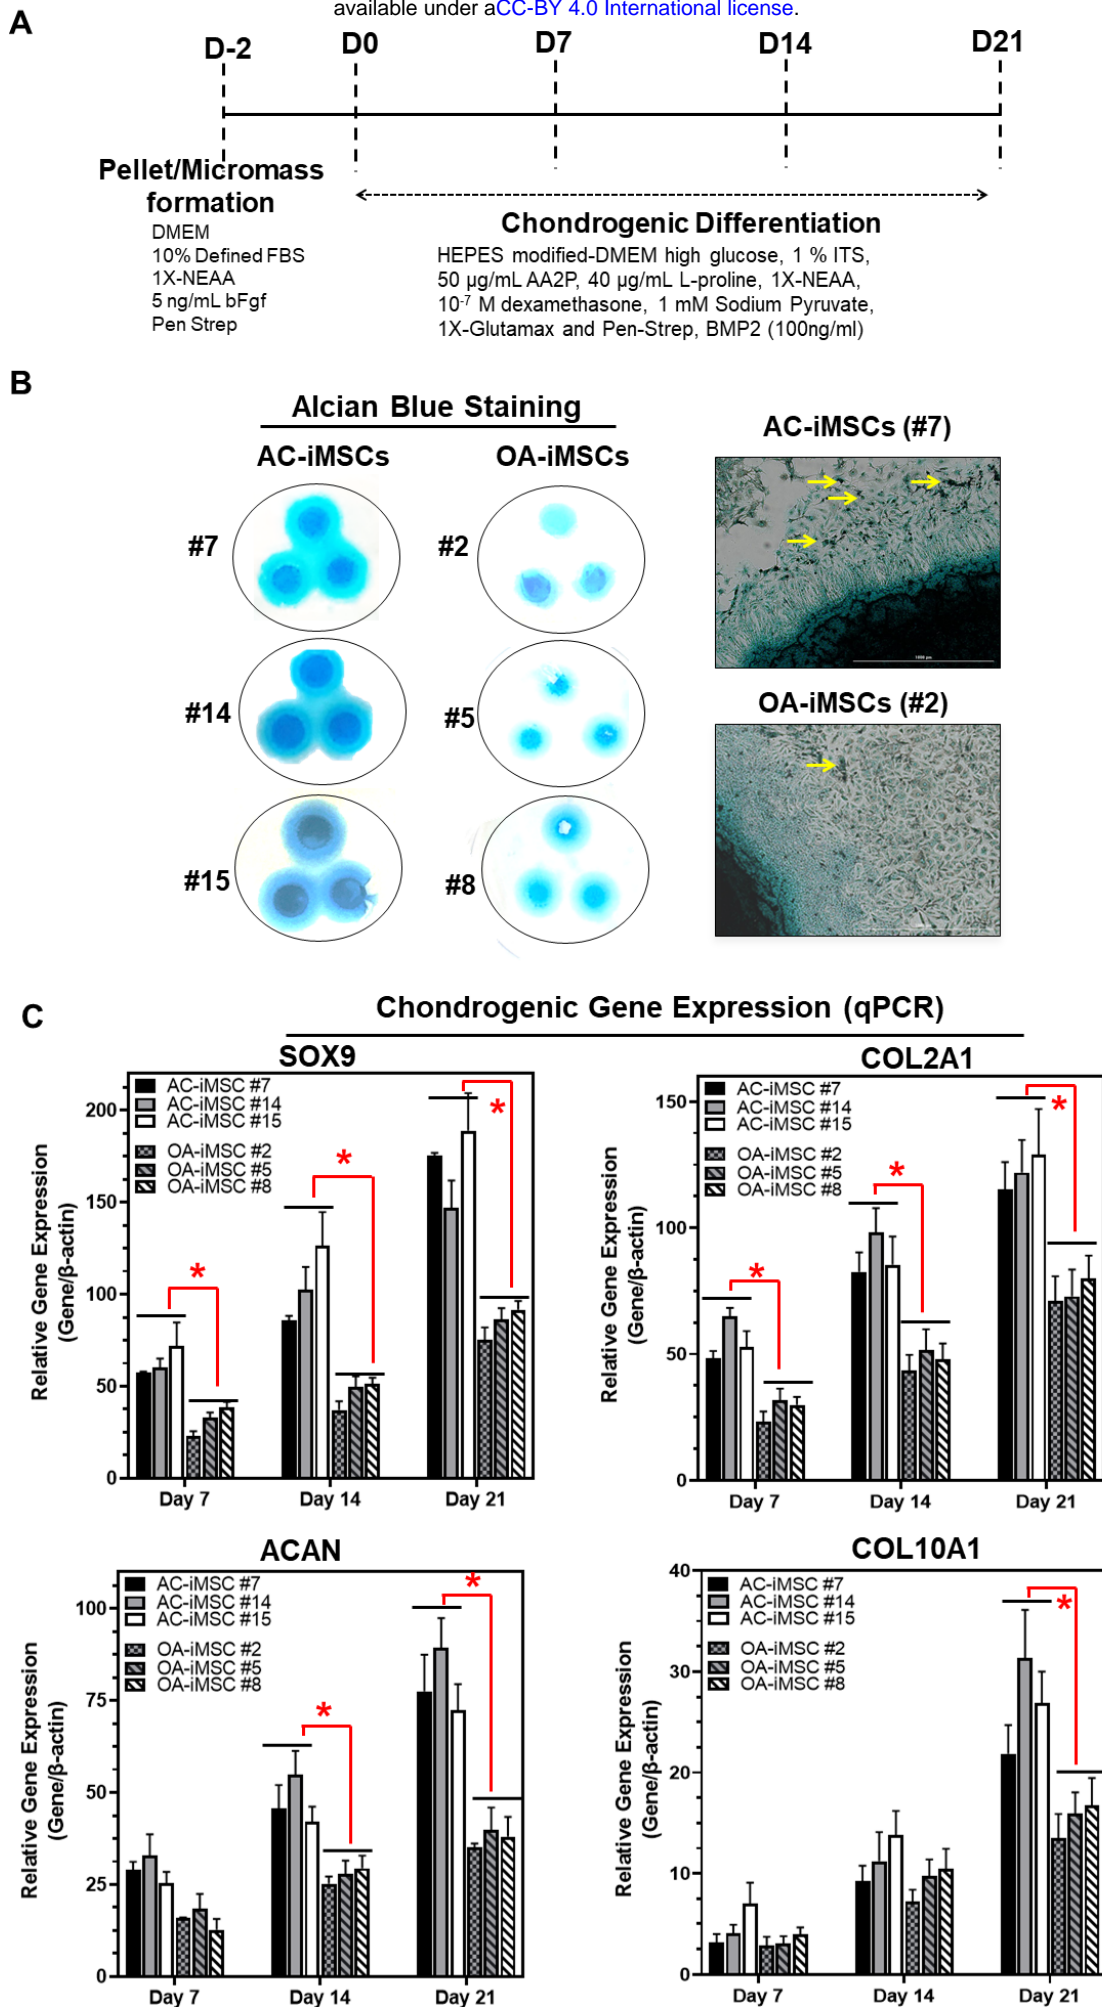

### A Volcano Plot at Day 21

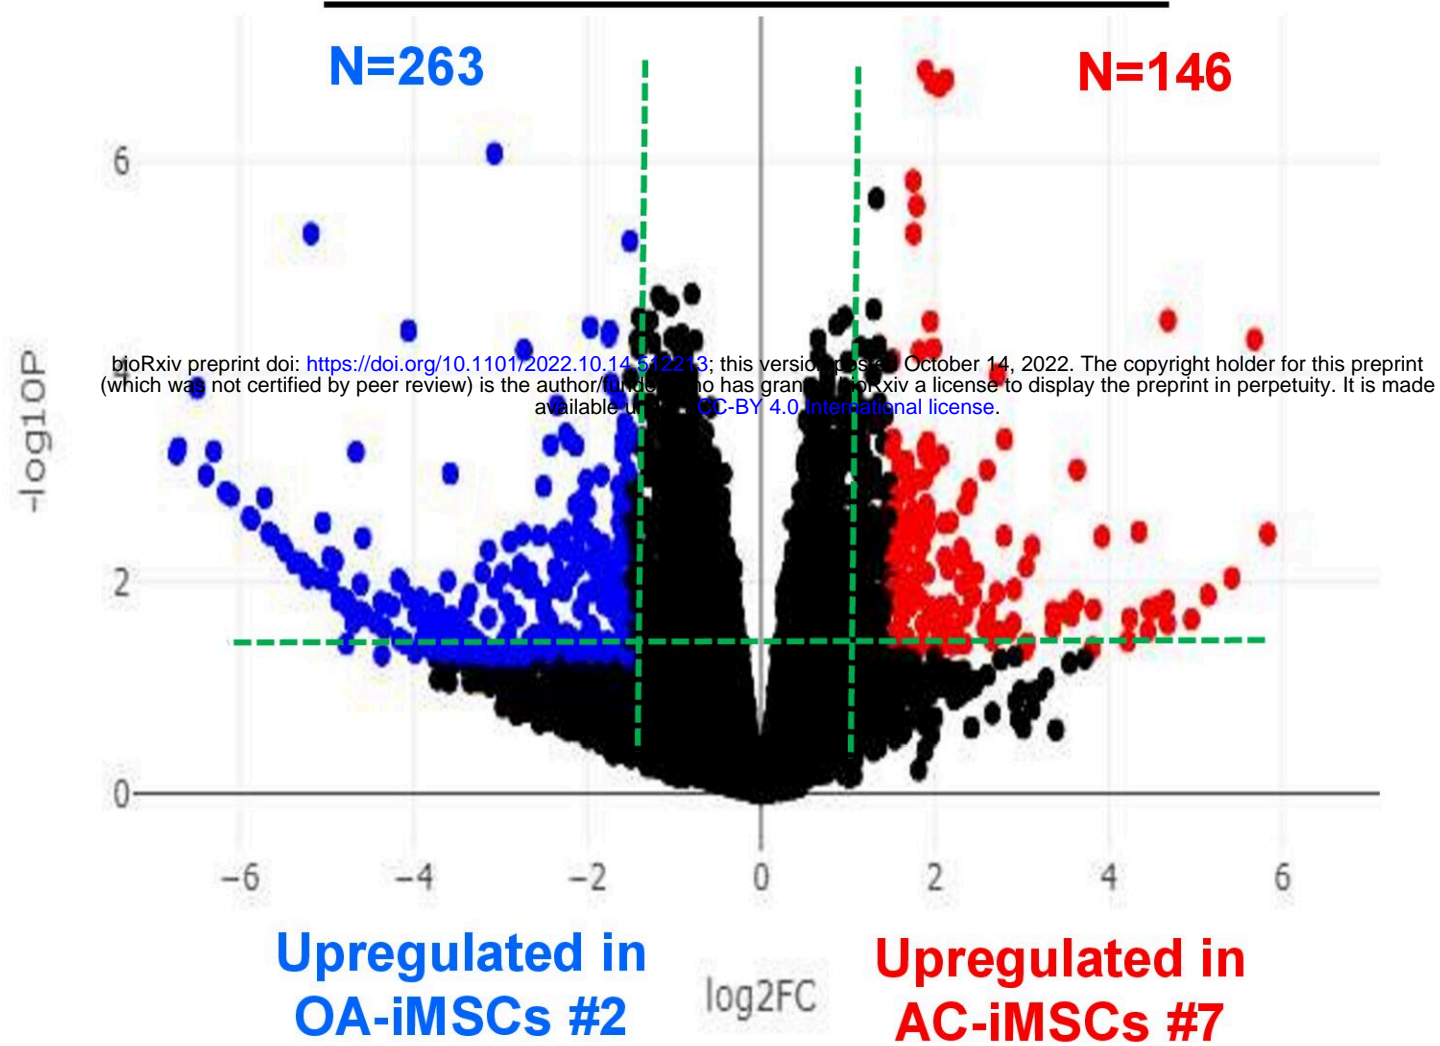

### B PC Analysis at Day 21

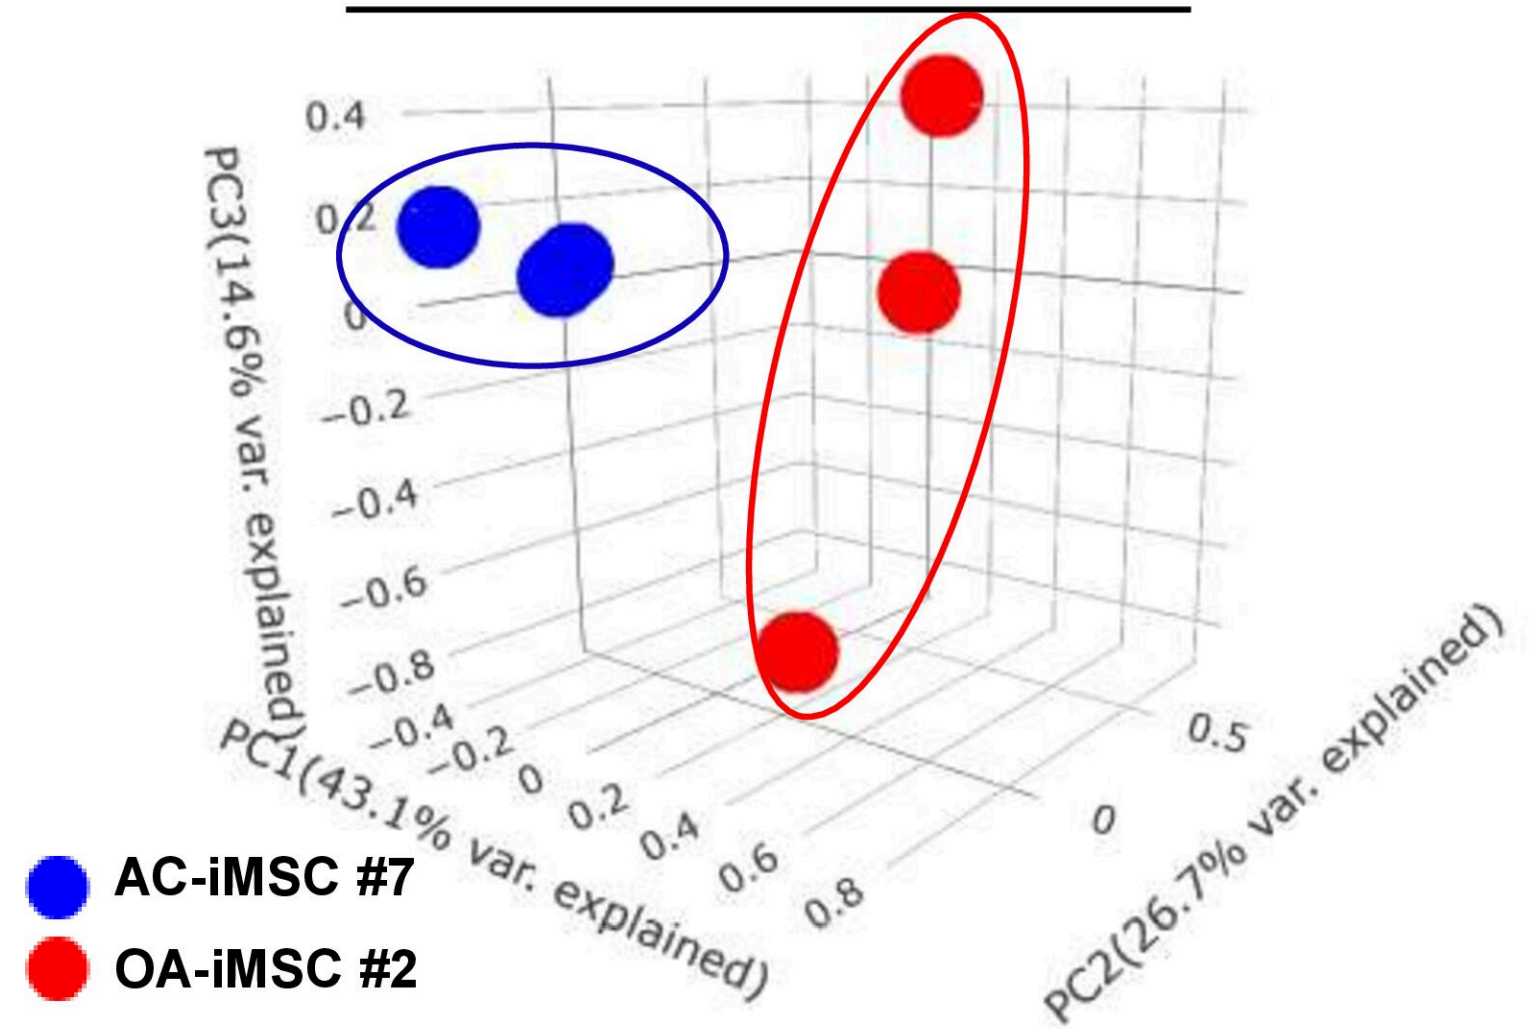

### C Gene Ontology (BP) analysis

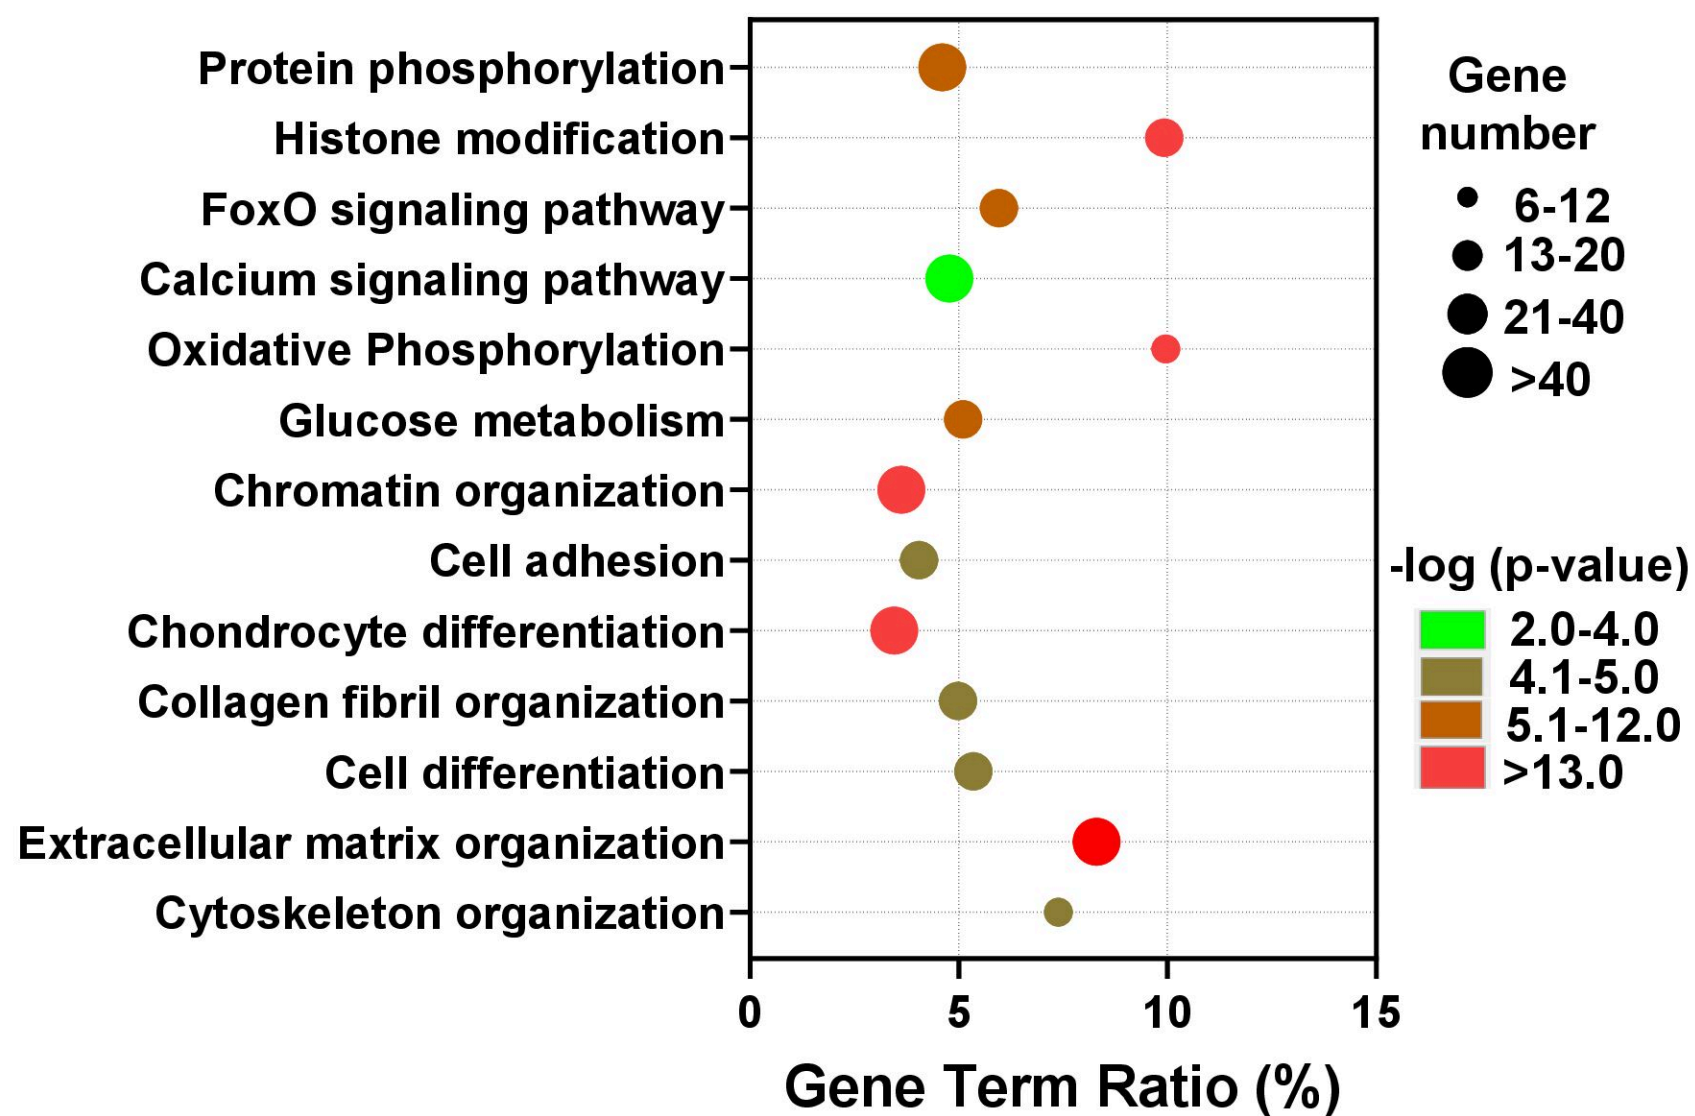

### D KEGG Pathway analysis

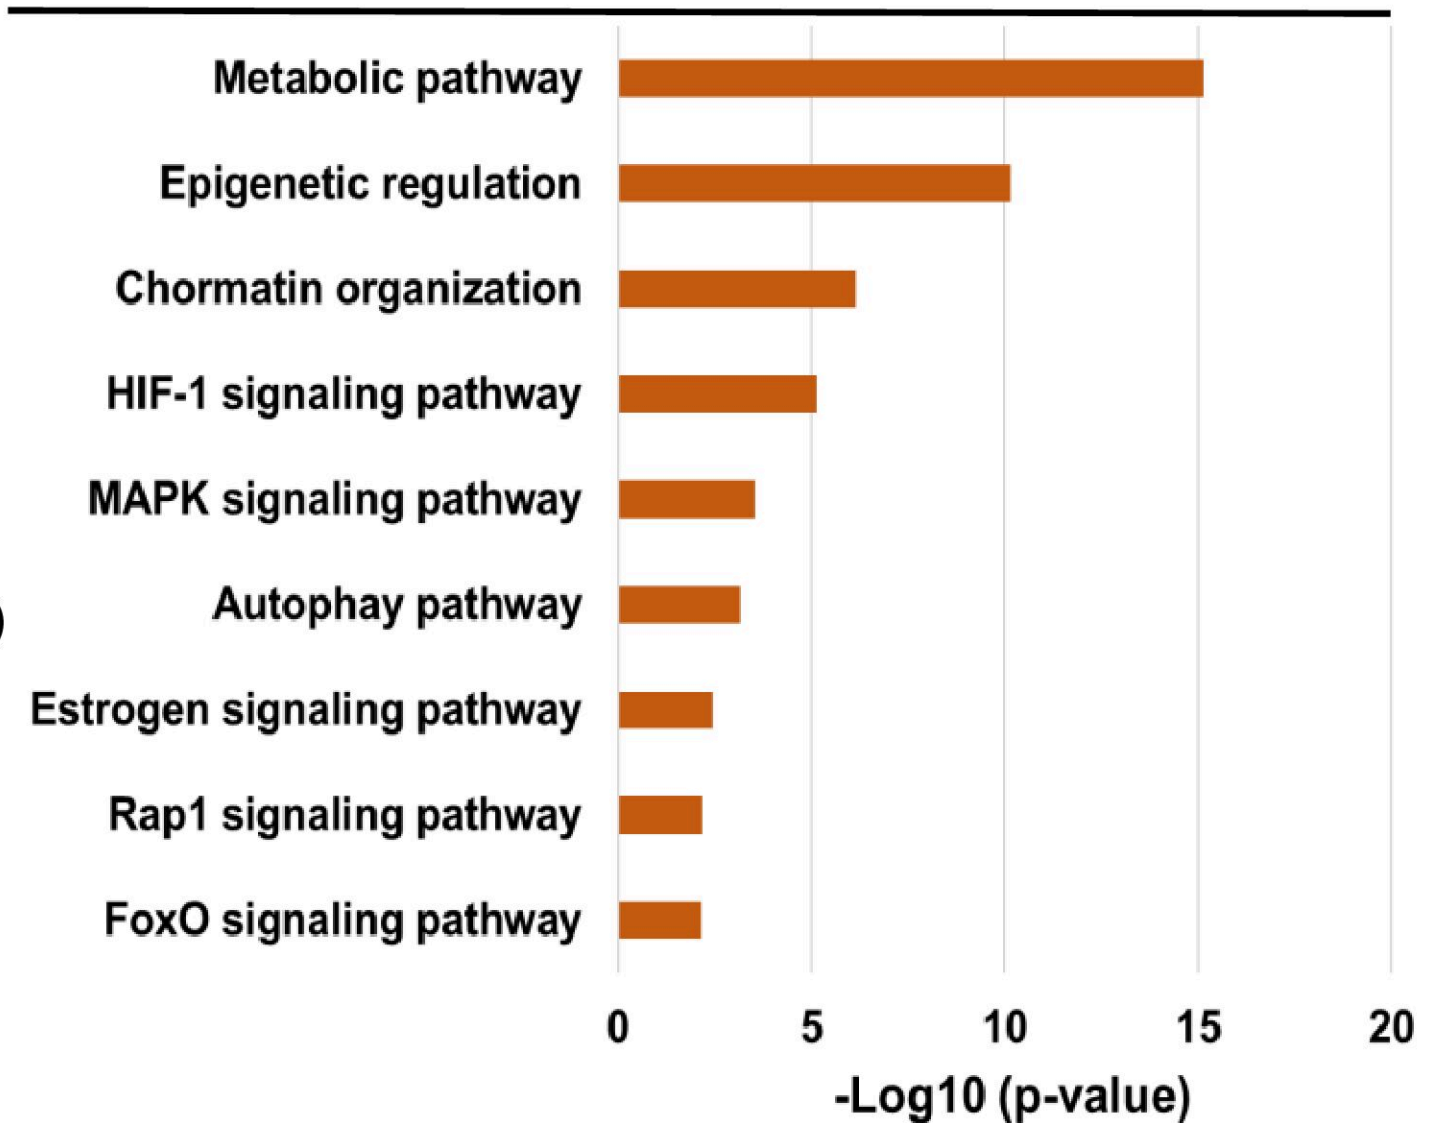





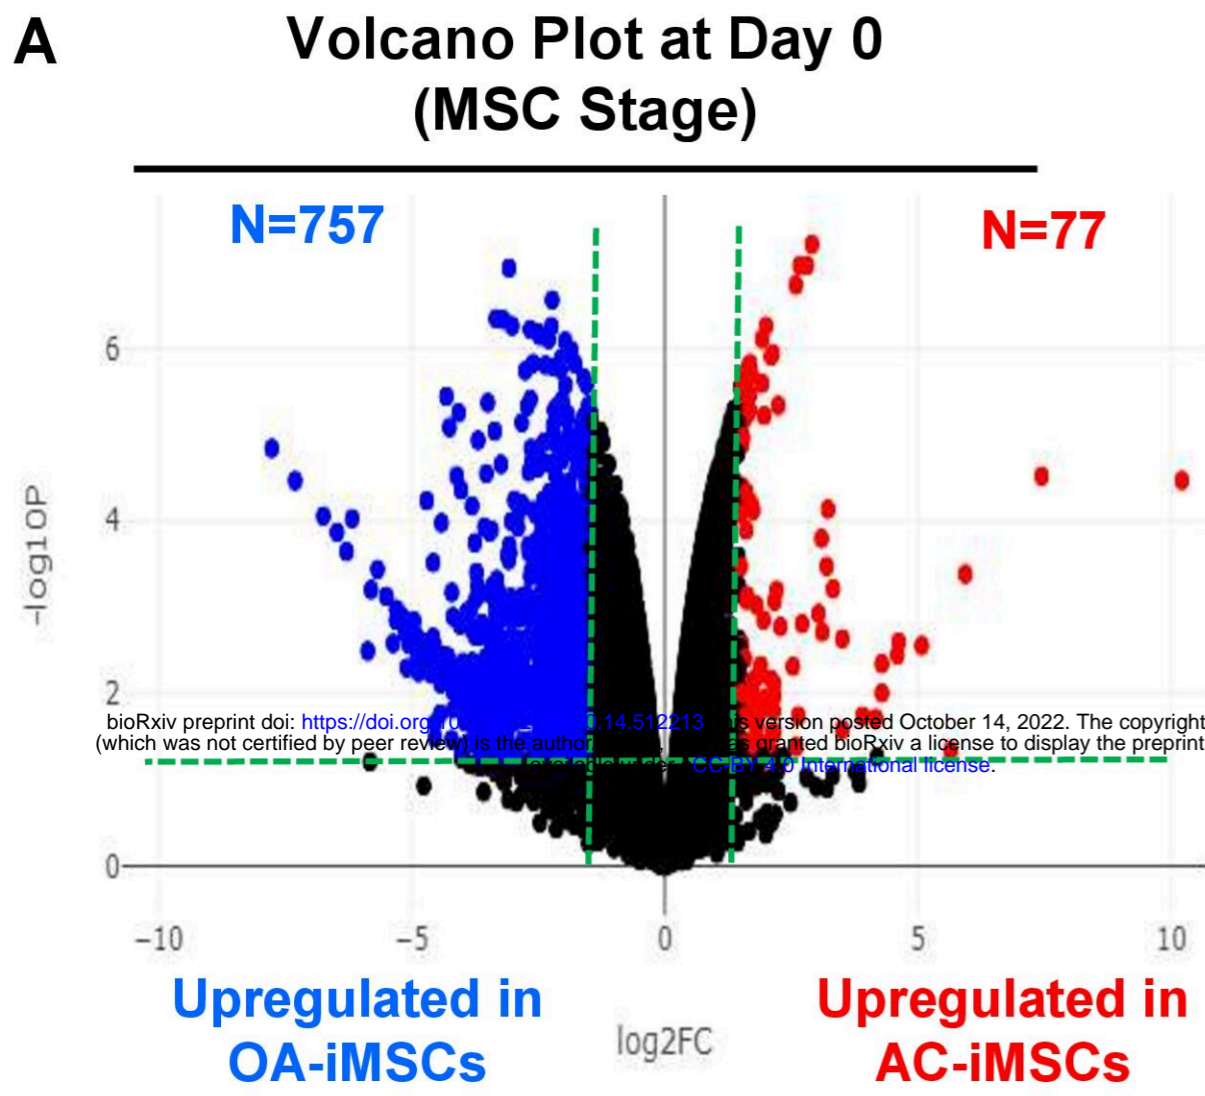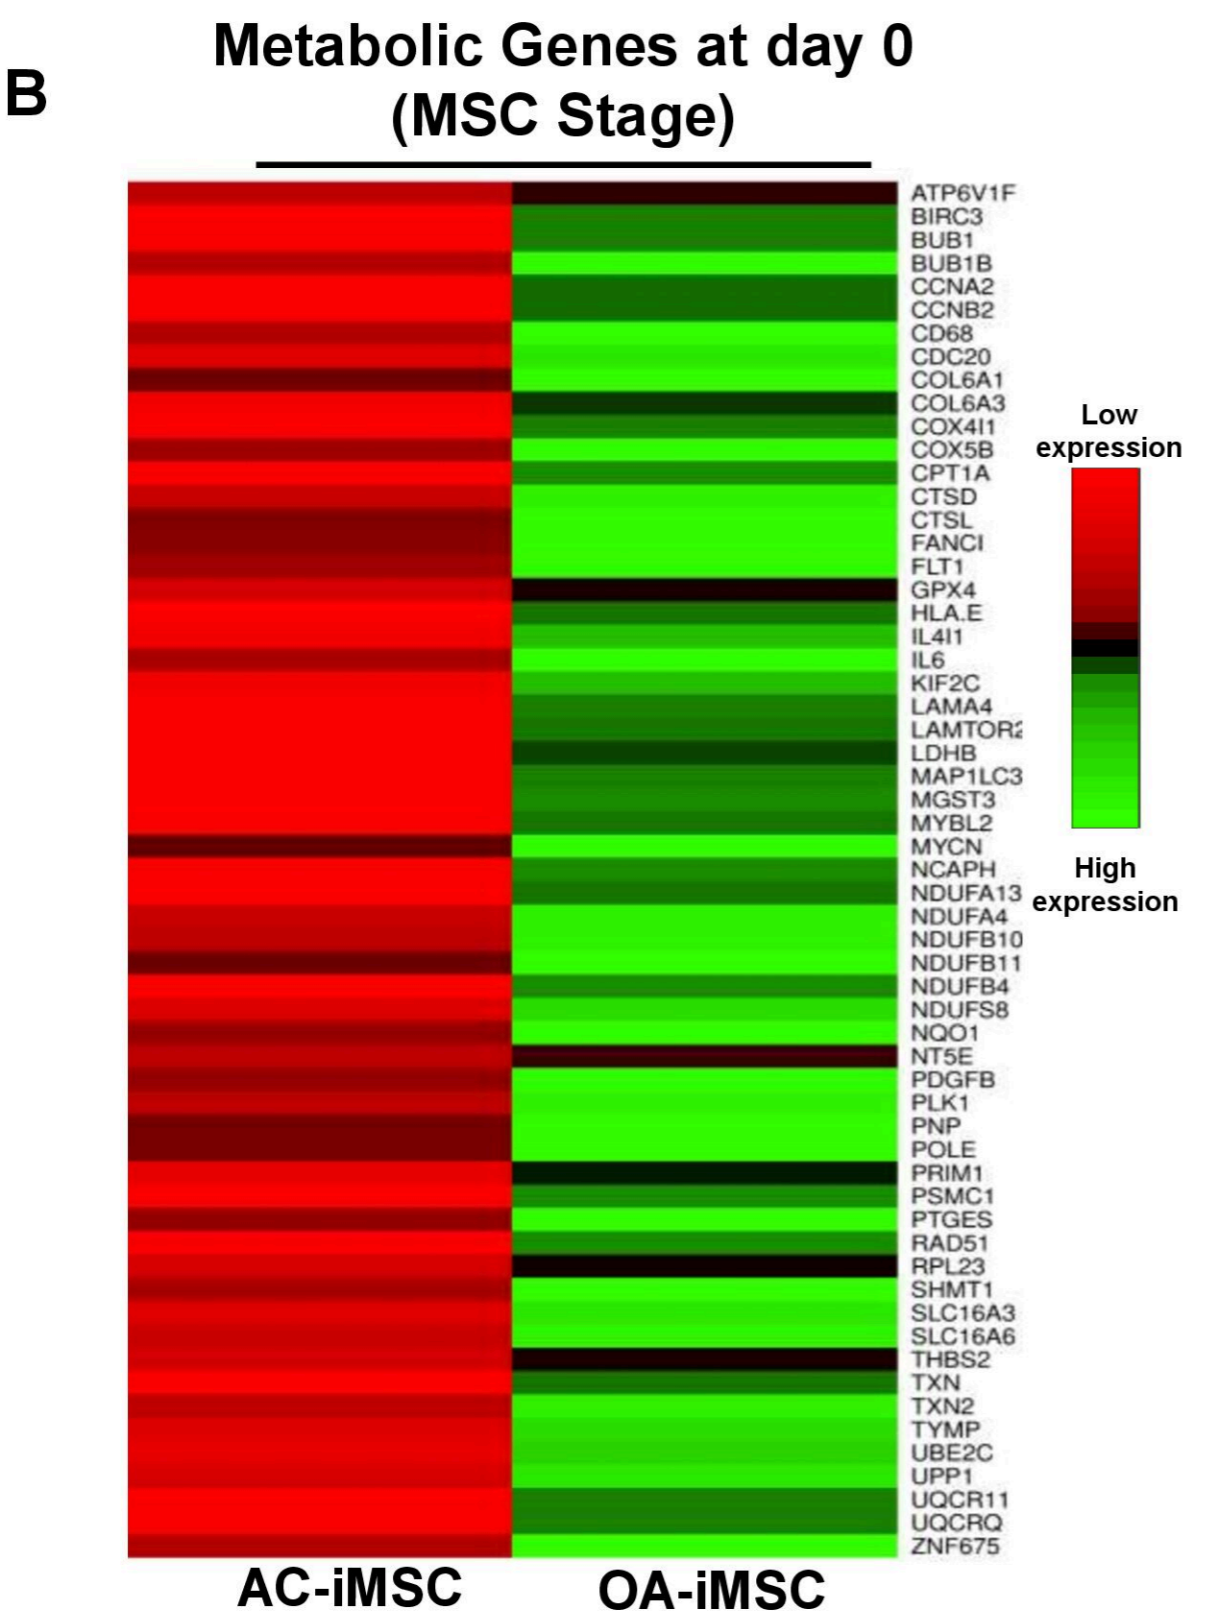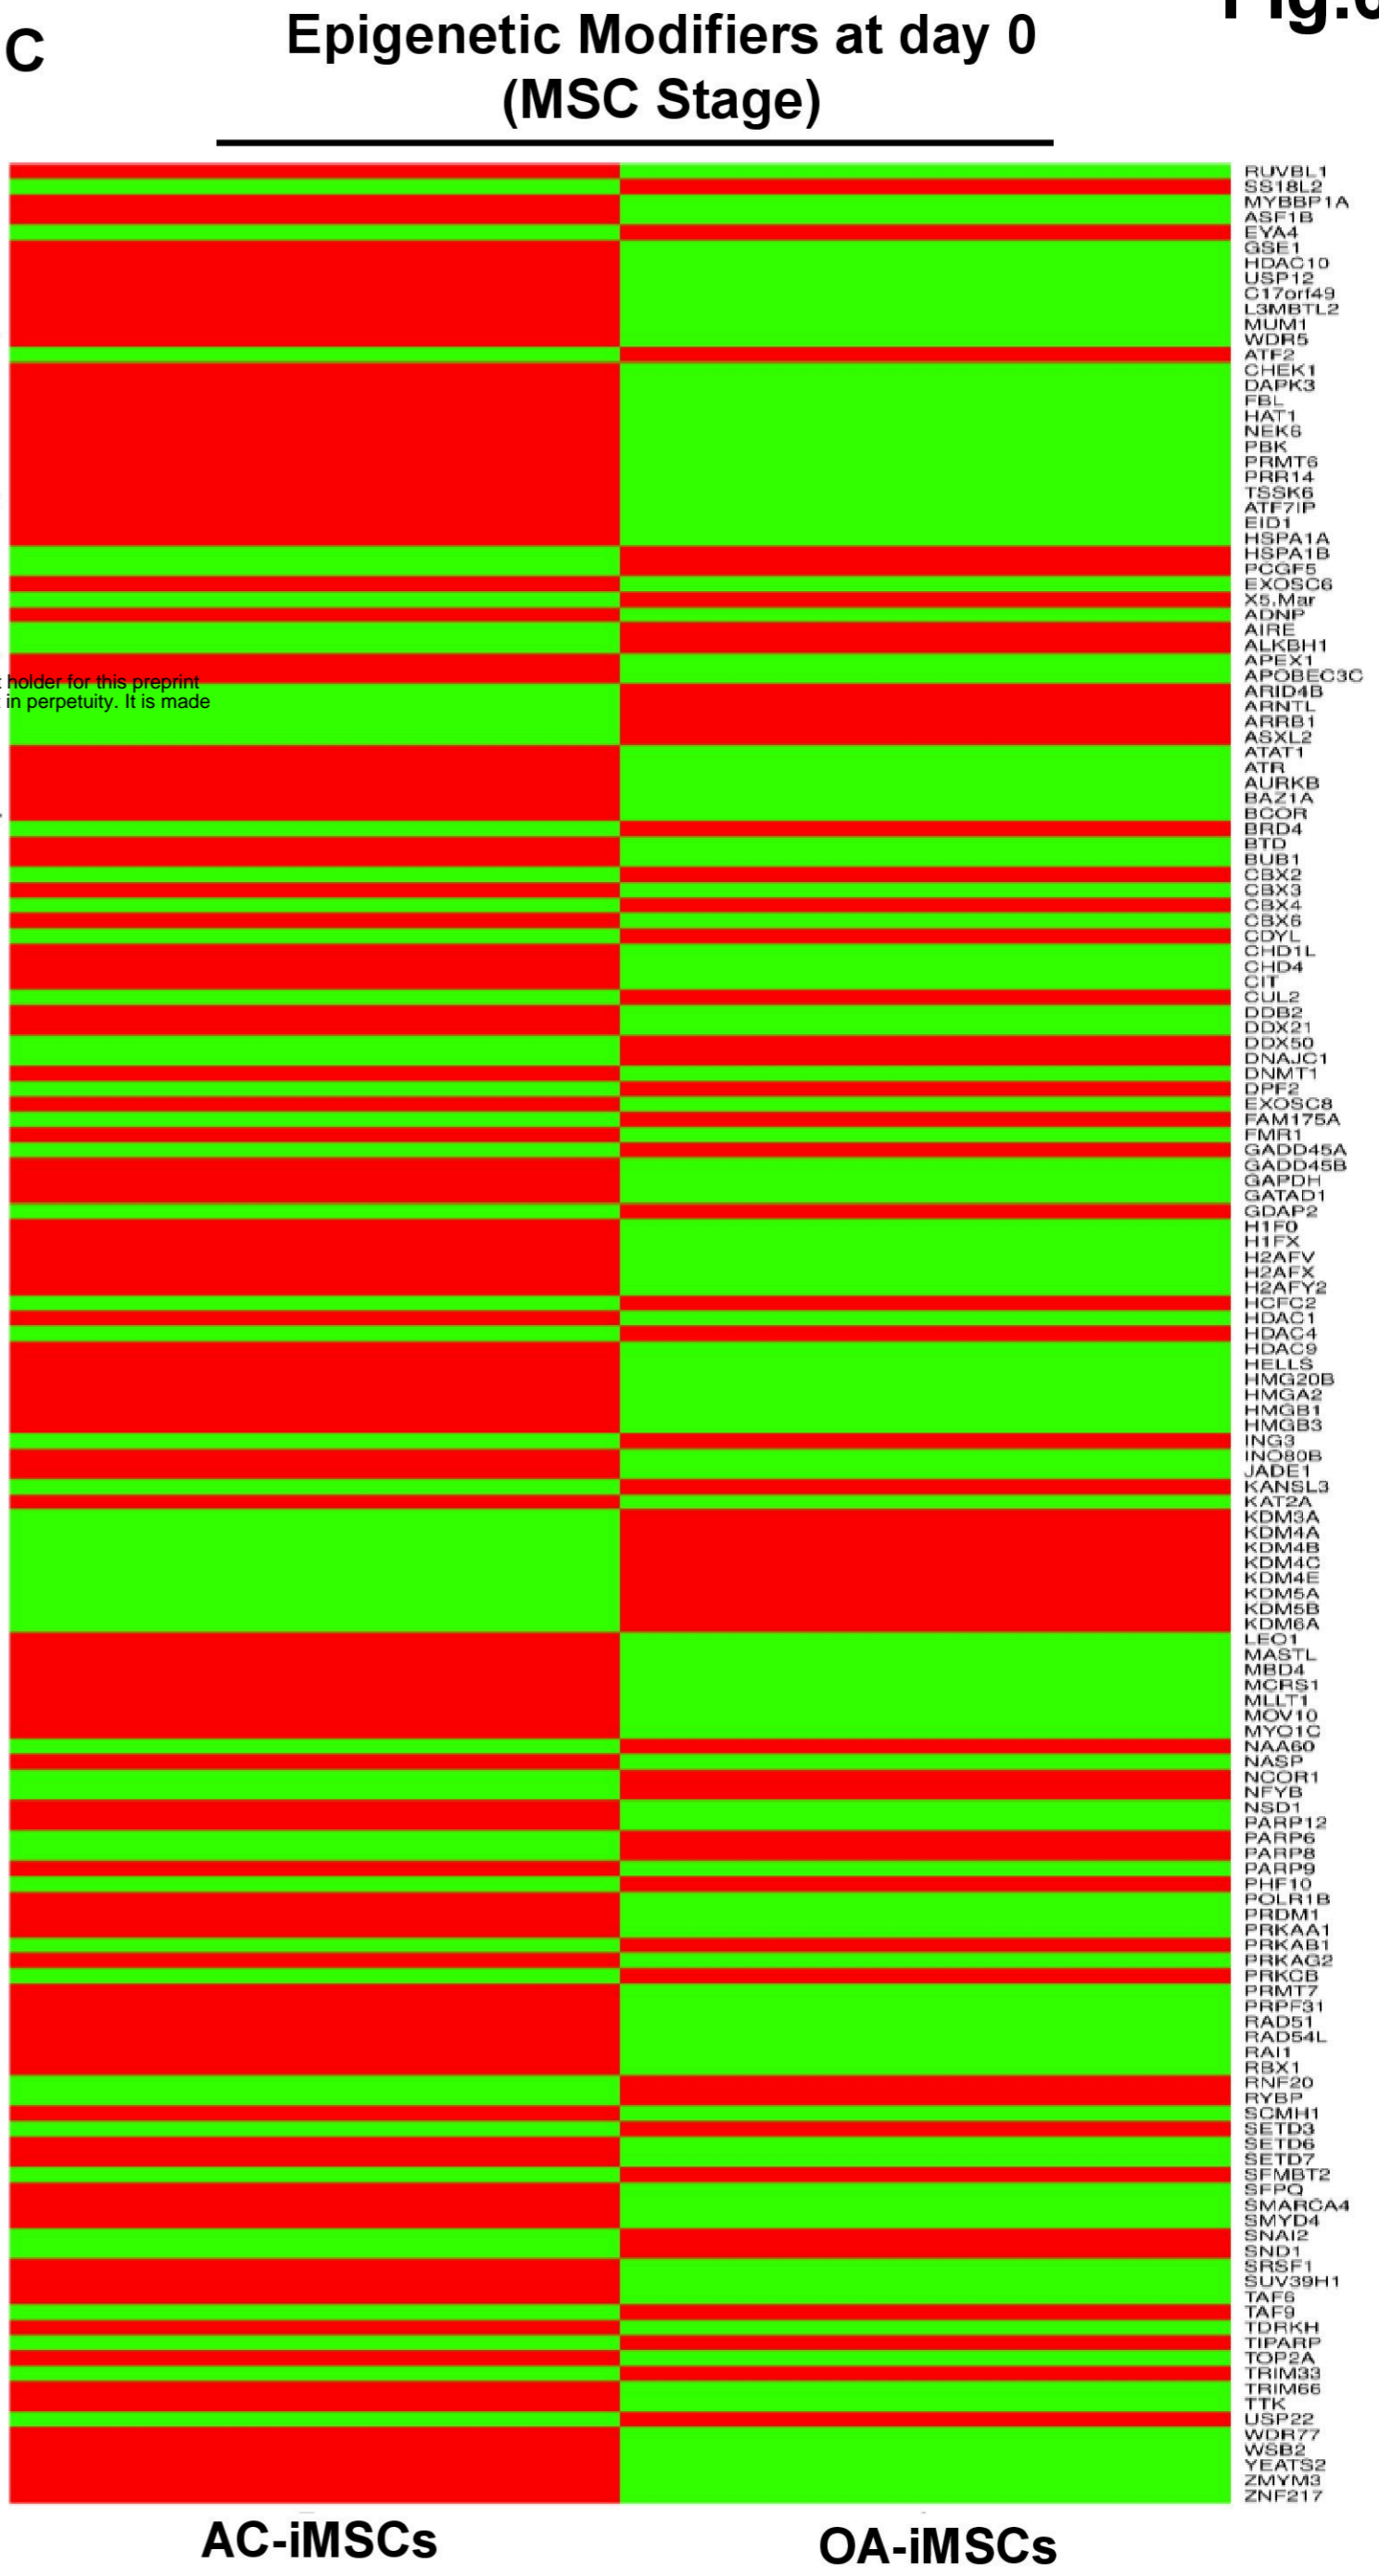

Fig.7

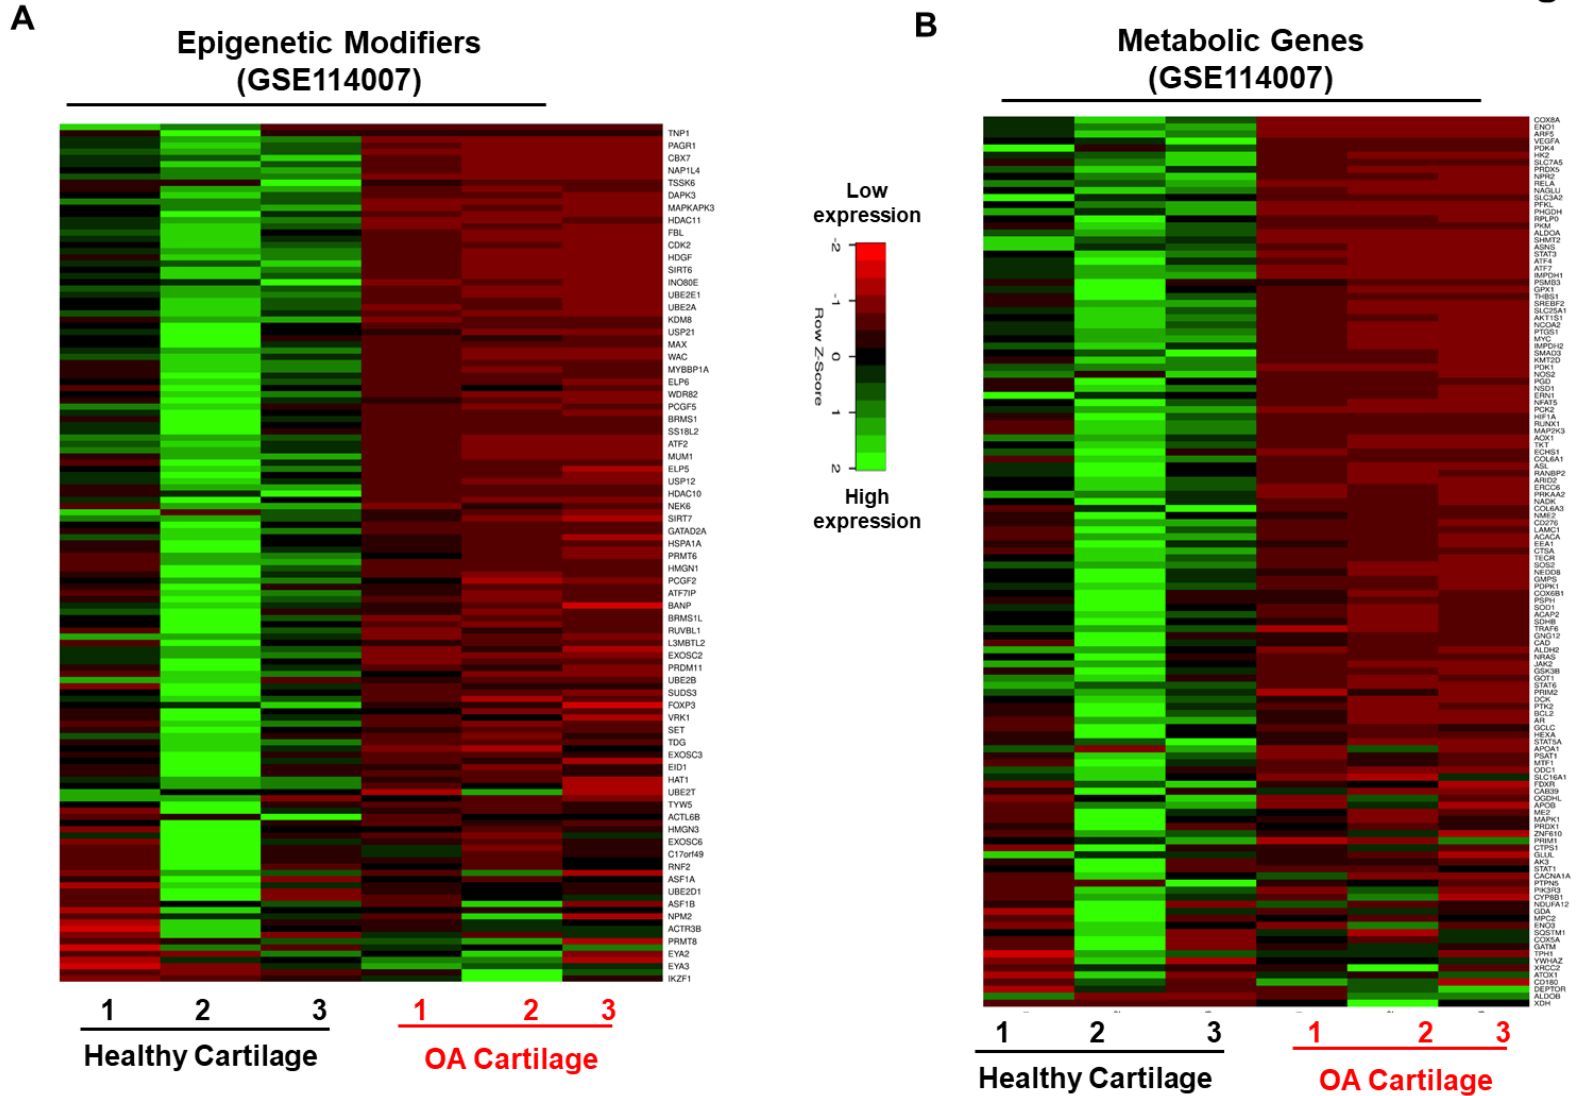

Sup. Fig. 1

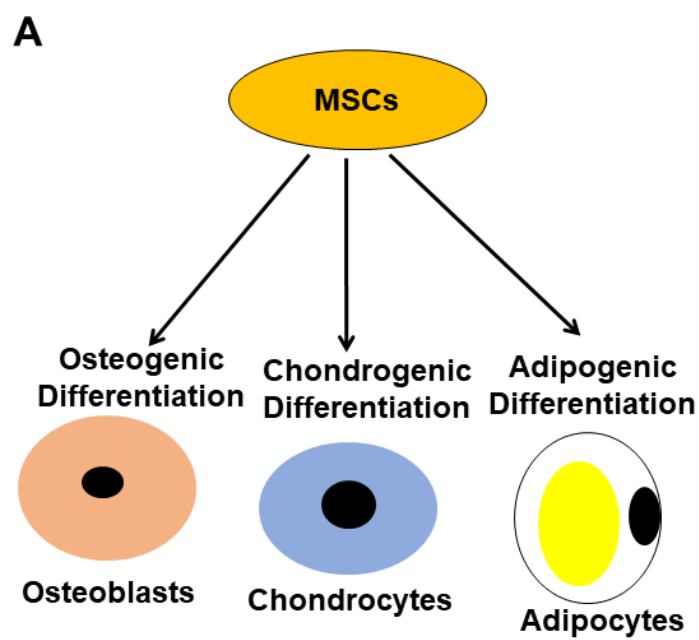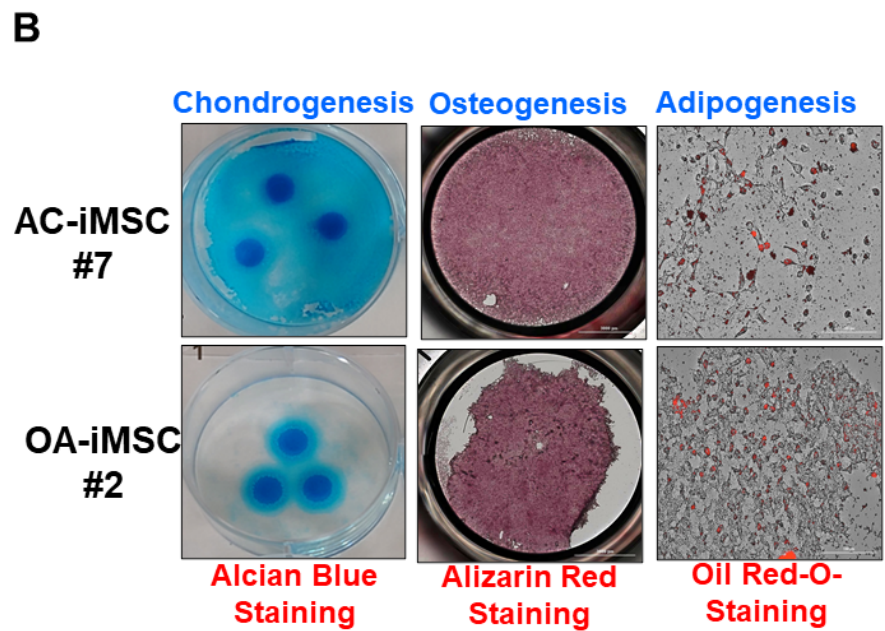

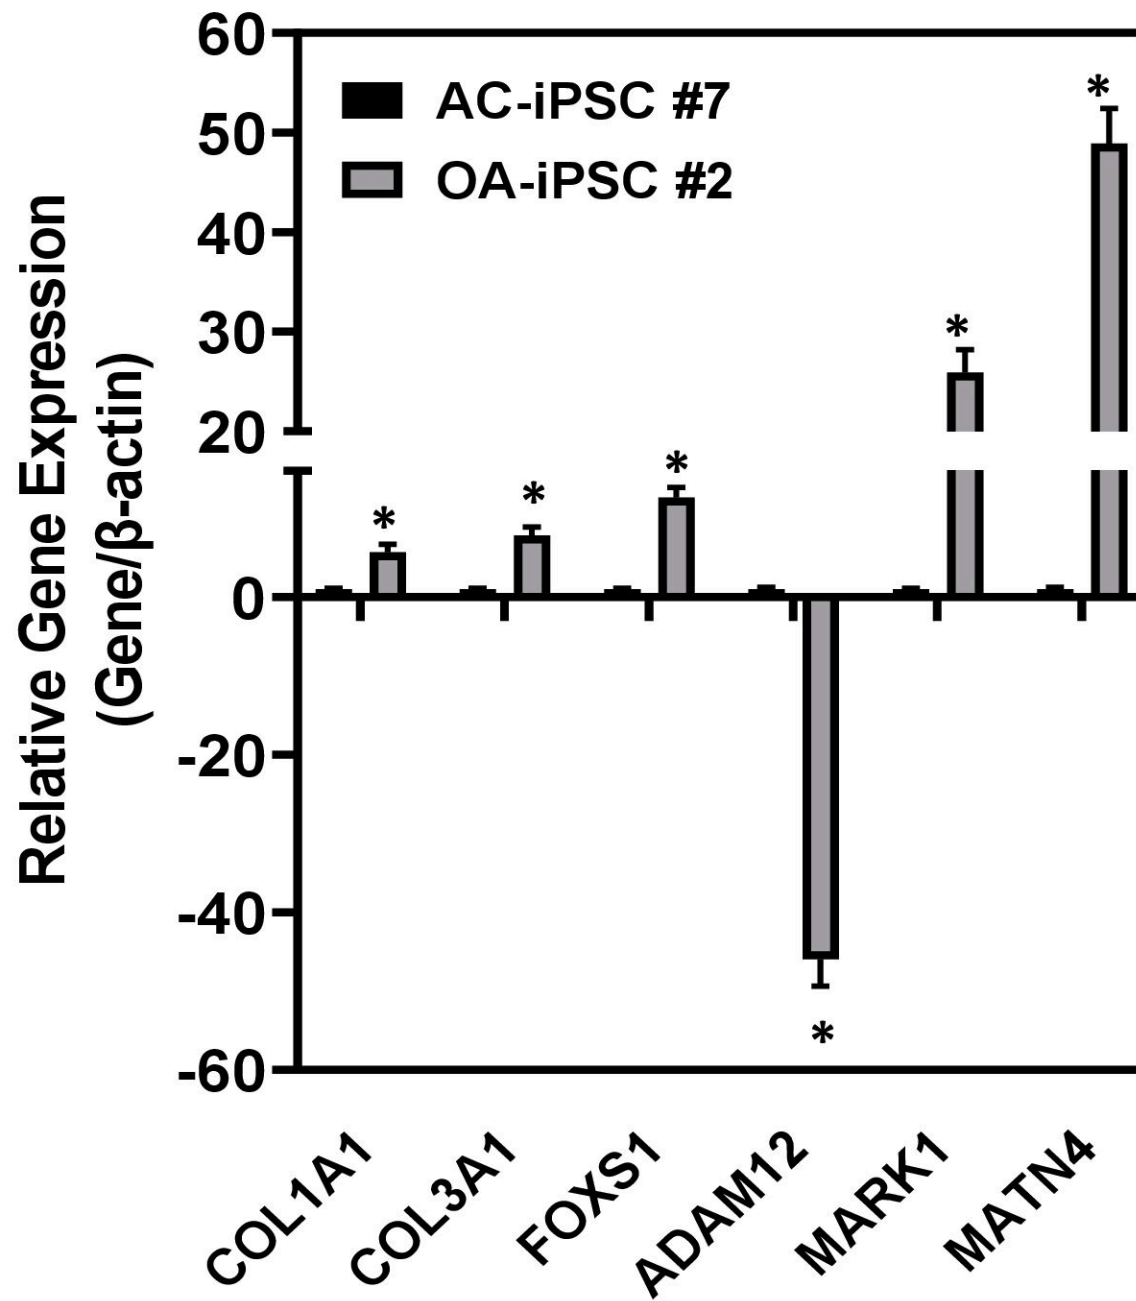

Source: https://www.biorxiv.org/content/10.1101/2022.10.14.512213v1.full.pdf
